# Supplementary material for: Synthesis of new enantiopure poly(hydroxy)aminooxepanes as building blocks for multivalent carbohydrate mimetics
Source: PubMed Central journal article supplement (PMC3943604; doi:10.3762/bjoc.10.17), 2014-01-20

**Supporting Information File 2**  
**for**  
**Synthesis of new enantiopure**  
**poly(hydroxy)aminooxepanes as building blocks for**  
**multivalent carbohydrate mimetics**

Léa Bouché, Maja Kandziora and Hans-Ulrich Reissig\*

Address: Freie Universität Berlin, Institut für Chemie und Biochemie, Takustrasse 3,  
D-14195 Berlin, Germany

Email: Hans-Ulrich Reissig - hans.reissig@chemie.fu-berlin.de

\* Corresponding author

**Characterization data  $^1\text{H}$  NMR and  $^{13}\text{C}$  NMR spectra of**  
**synthesized compounds**

**Table of contents:**

|                                                         |     |
|---------------------------------------------------------|-----|
| - NMR spectra of the ethyl ester                        | s2  |
| - NMR spectra of ( <i>Z</i> )-nitrones and 1,2 oxazines | s3  |
| - NMR spectra of bicyclic 1,2-oxazines                  | s9  |
| - NMR spectra of oxepanes                               | s29 |
| - NOE experiments                                       | s36 |





**<sup>1</sup>H NMR (500 MHz, CDCl<sub>3</sub>)**

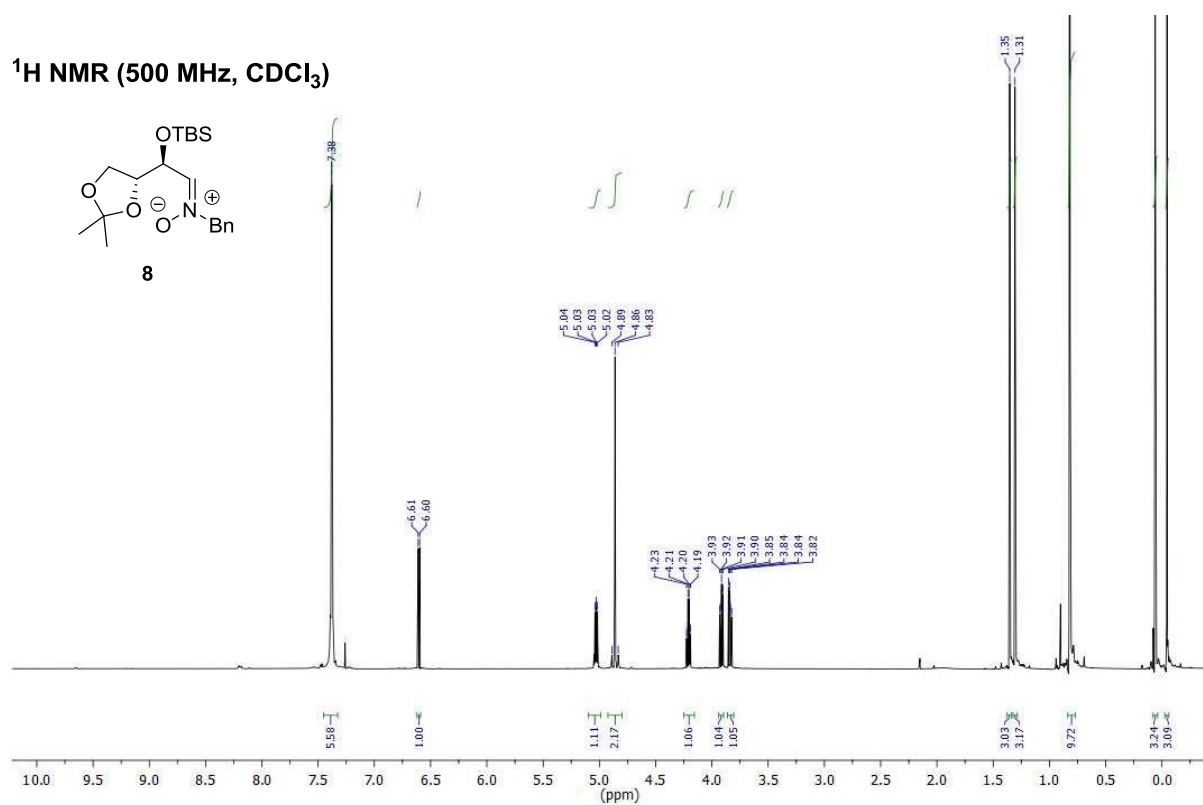

**<sup>13</sup>C NMR (125 MHz, CDCl<sub>3</sub>)**

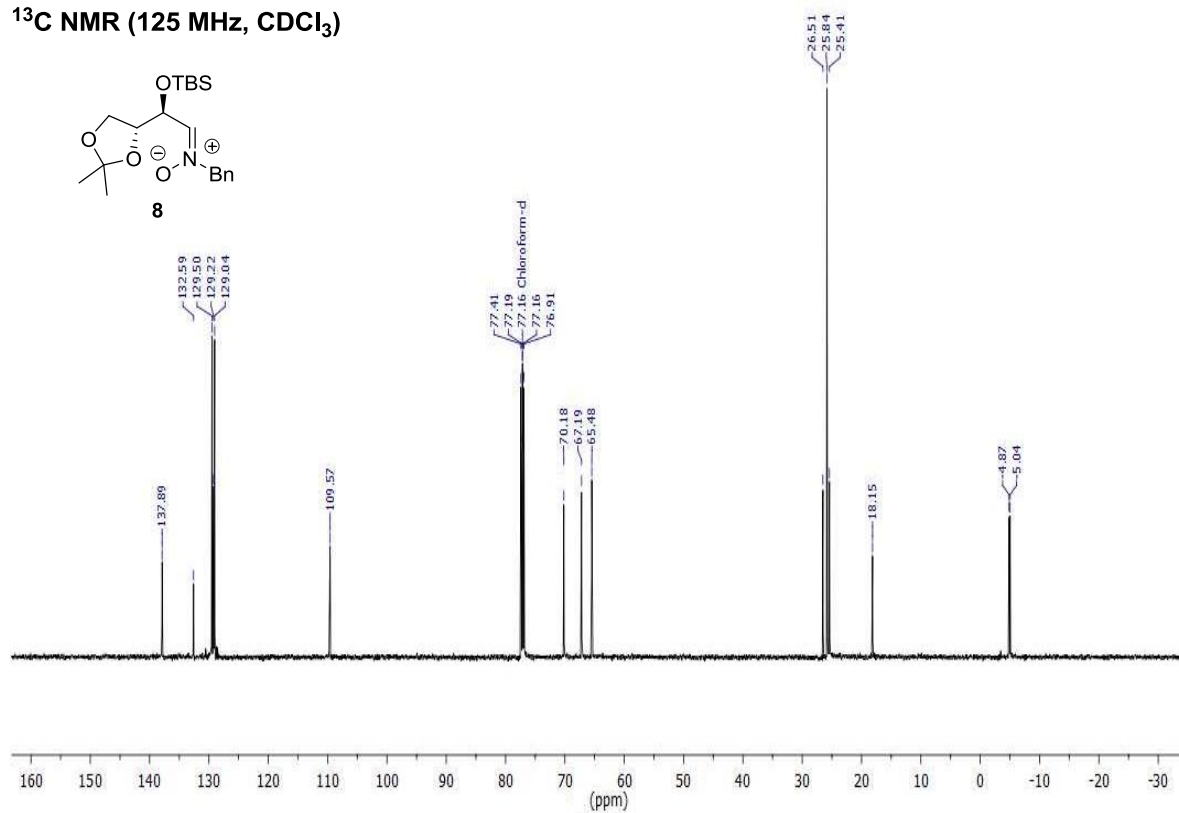

**<sup>1</sup>H NMR (500 MHz, CDCl<sub>3</sub>)**

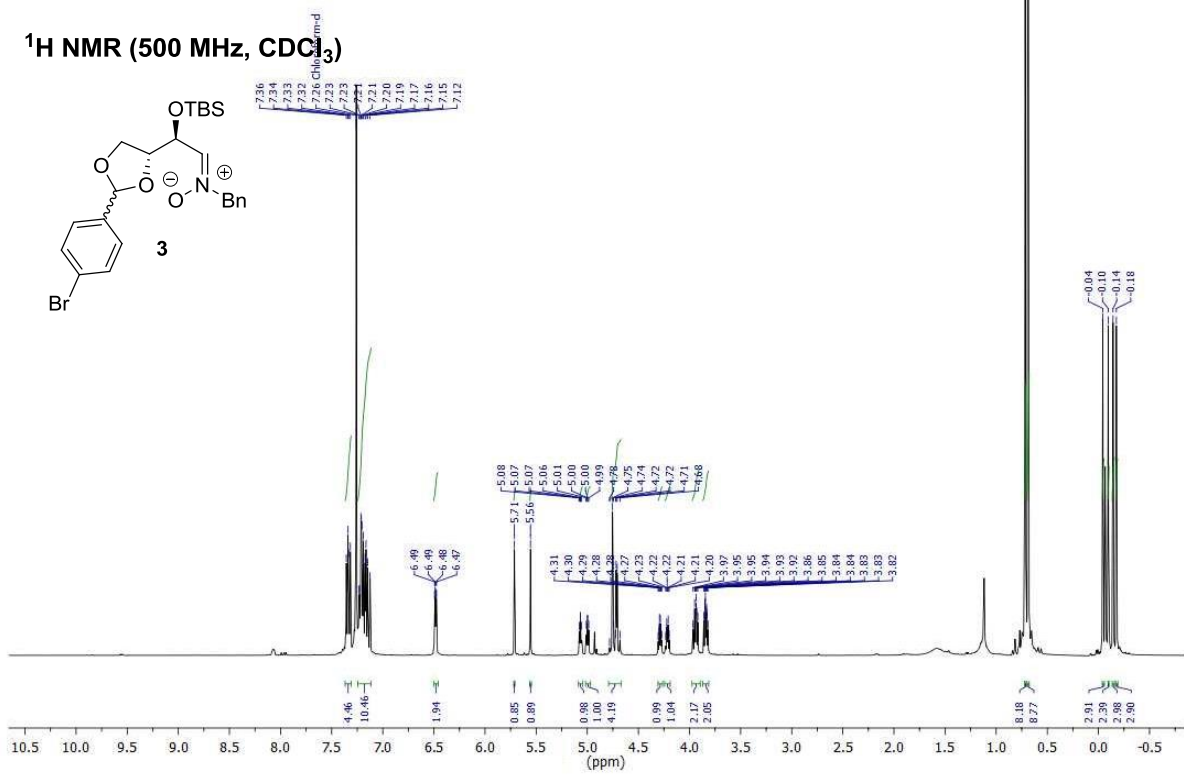

**<sup>13</sup>C NMR (125 MHz, CDCl<sub>3</sub>)**

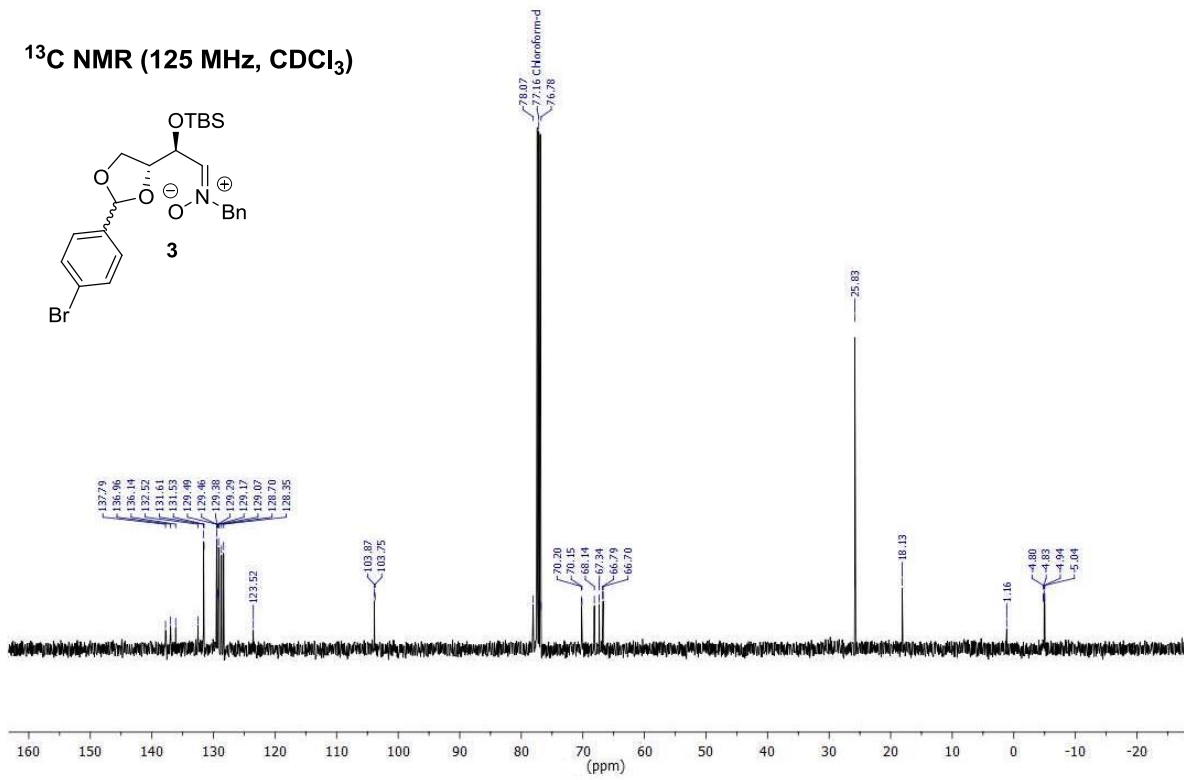

**<sup>1</sup>H NMR (700 MHz, CDCl<sub>3</sub>)**

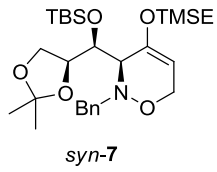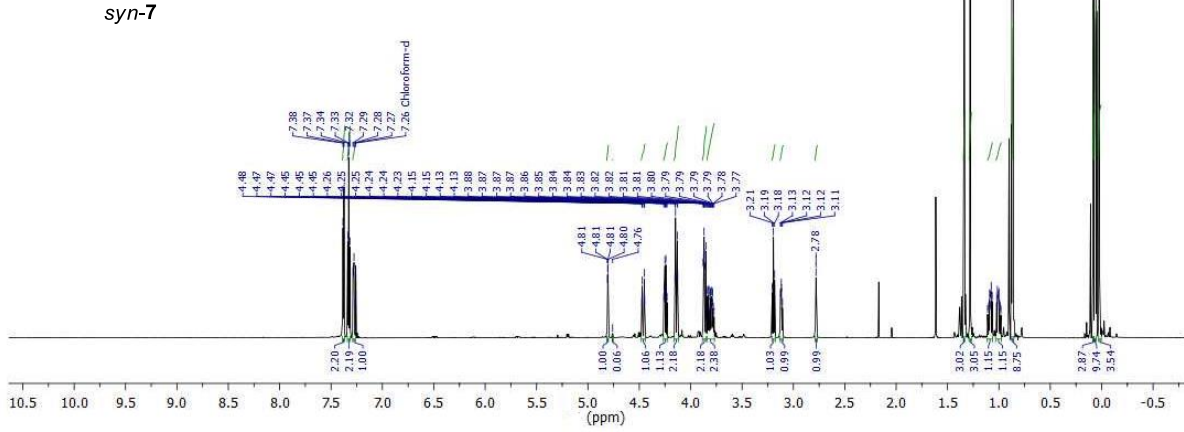

**<sup>1</sup>H NMR (700 MHz, CDCl<sub>3</sub>)**

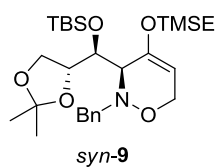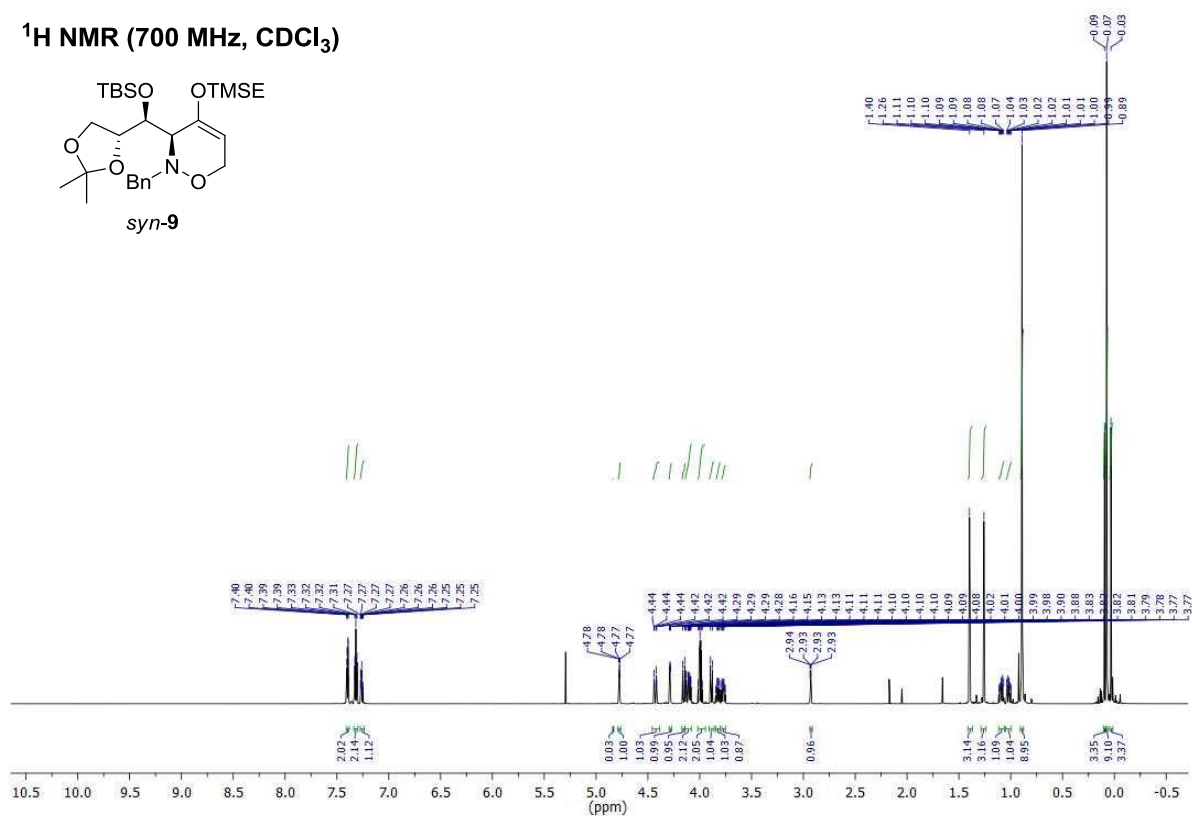

**<sup>13</sup>C NMR (175 MHz, CDCl<sub>3</sub>)**

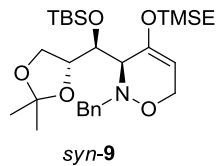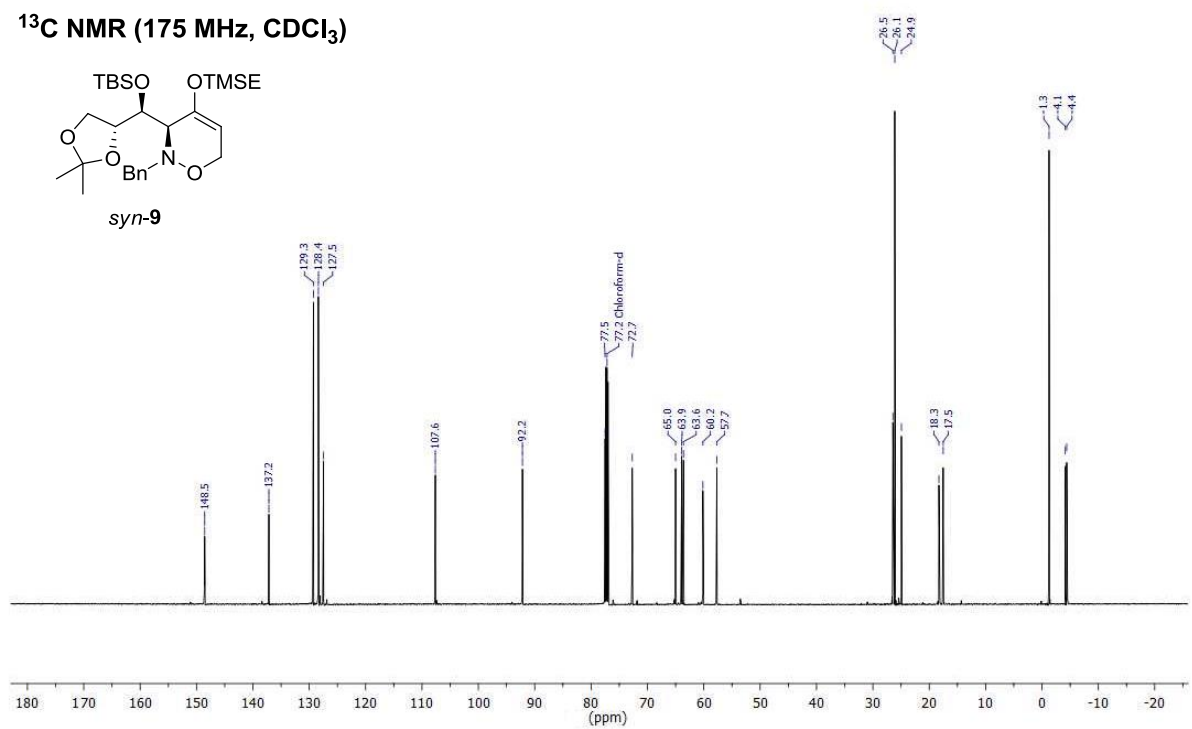

**<sup>1</sup>H NMR (700 MHz, CDCl<sub>3</sub>)**

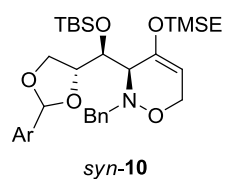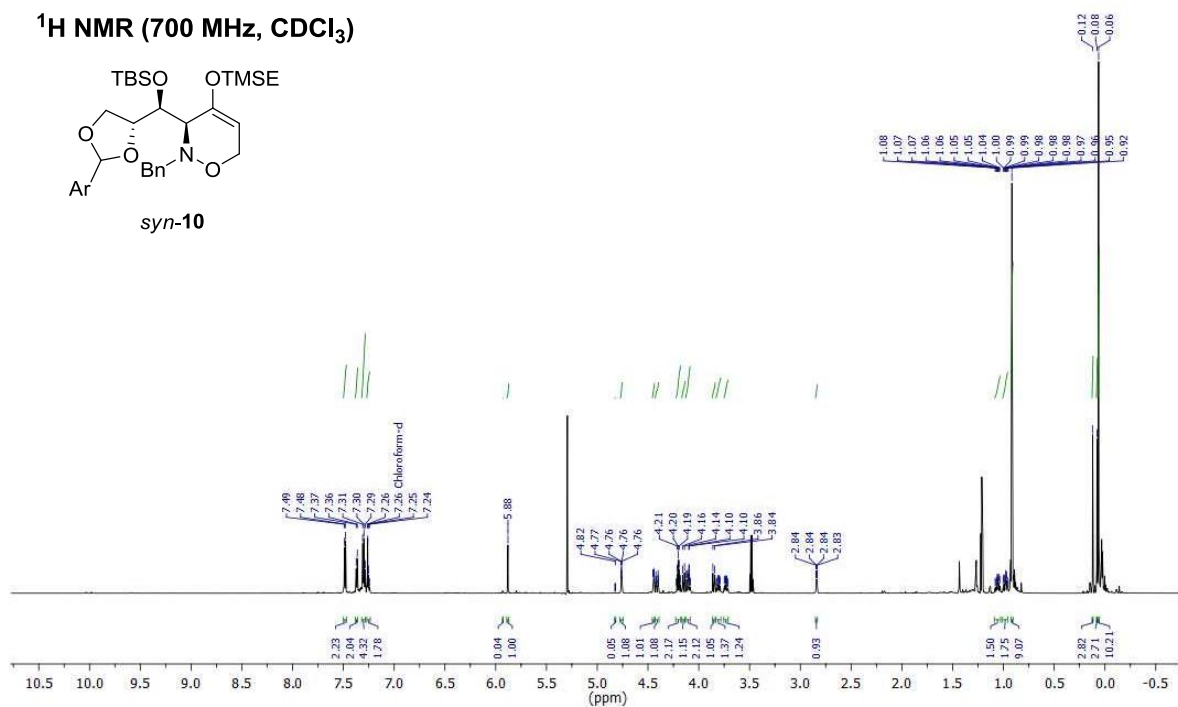

**<sup>13</sup>C NMR (175 MHz, CDCl<sub>3</sub>)**

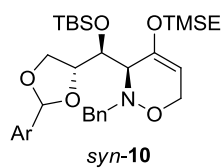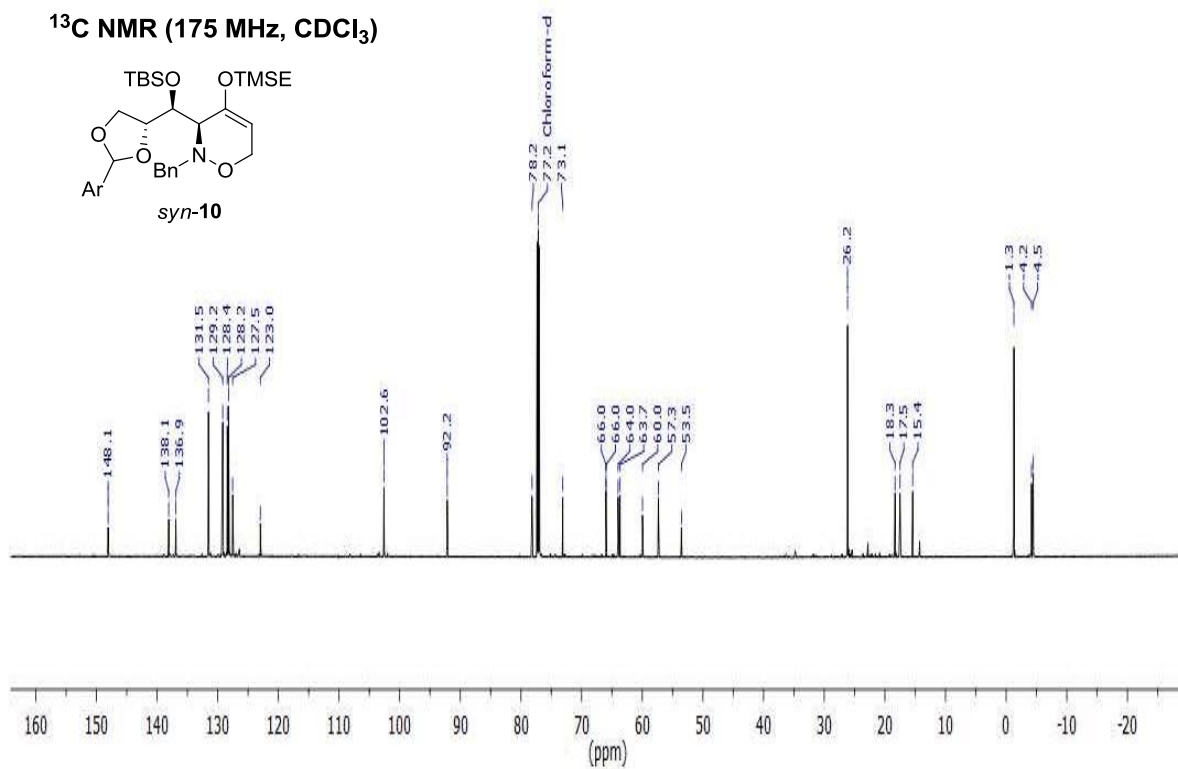



**<sup>1</sup>H NMR (500 MHz, CDCl<sub>3</sub>)**

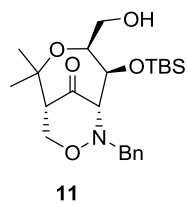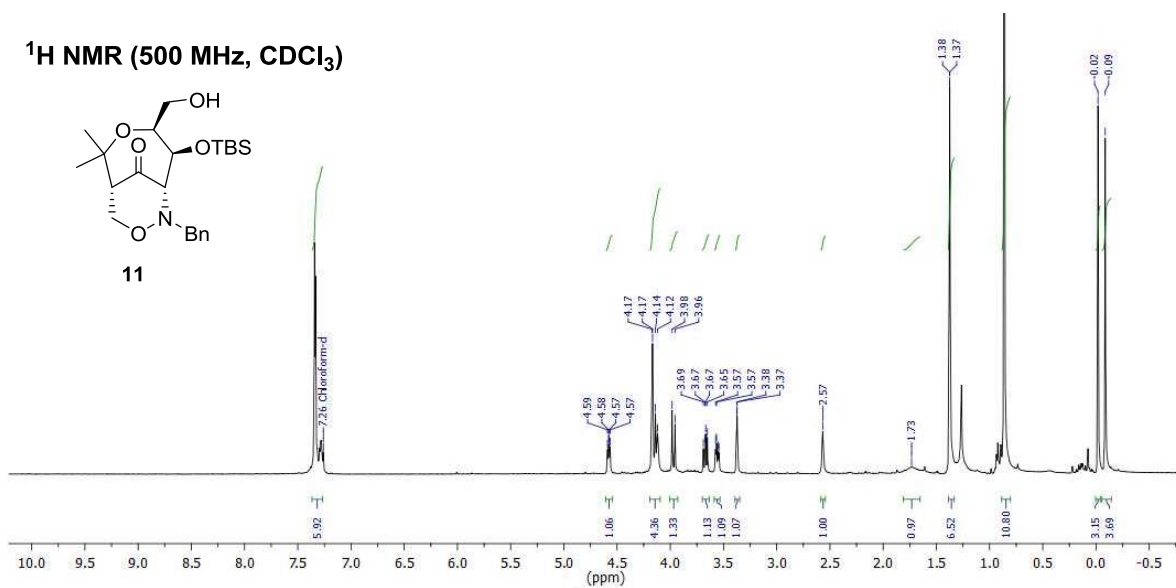

**<sup>13</sup>C NMR (125 MHz, CDCl<sub>3</sub>)**

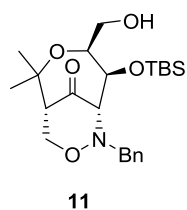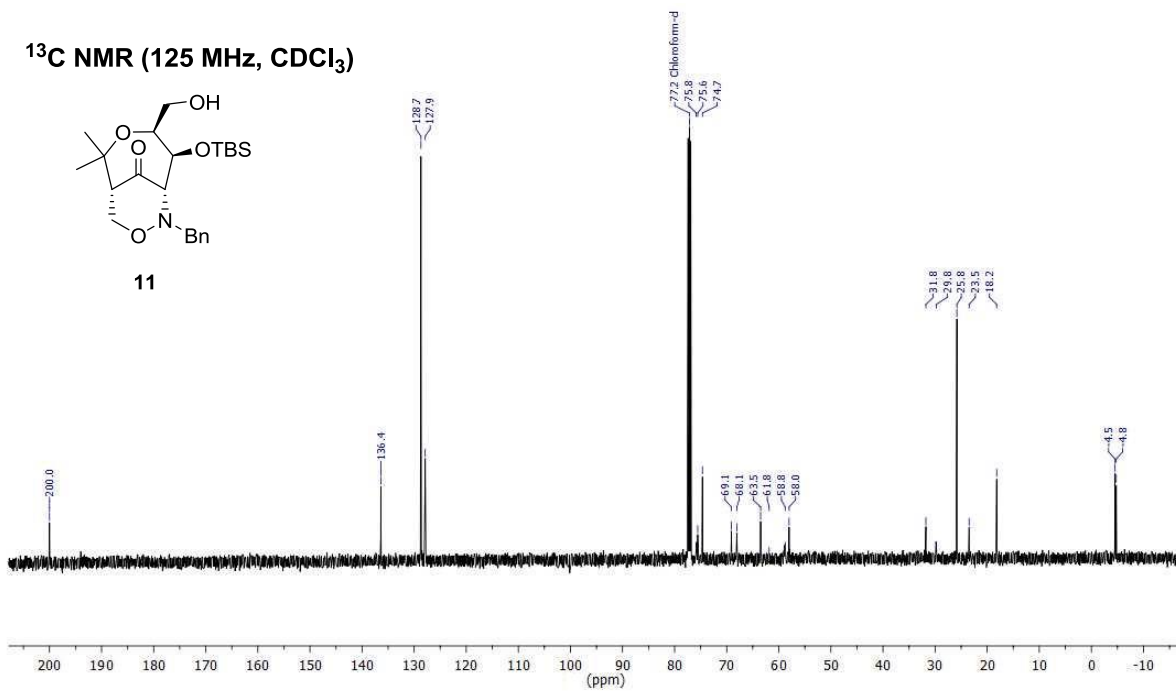

**<sup>1</sup>H NMR (500 MHz, CDCl<sub>3</sub>)**

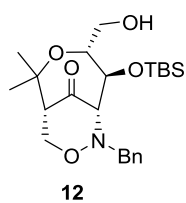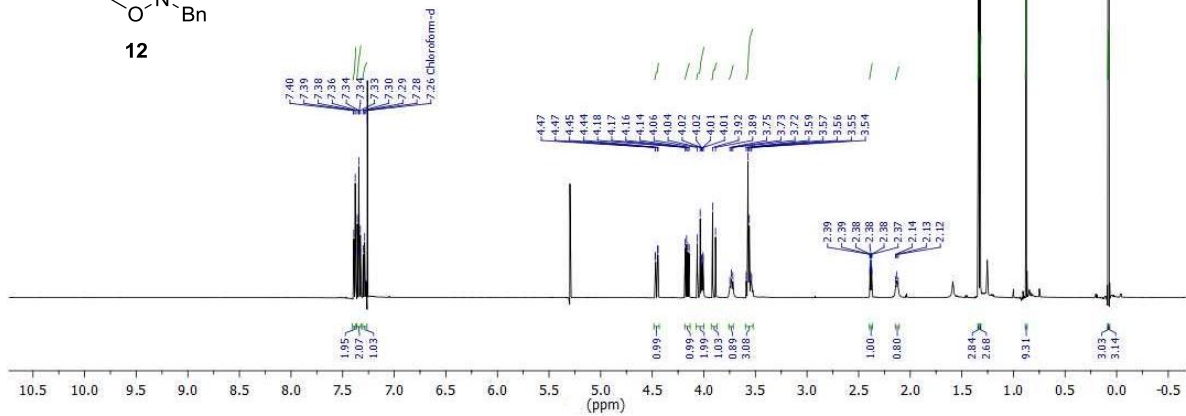

**<sup>13</sup>C NMR (125 MHz, CDCl<sub>3</sub>)**

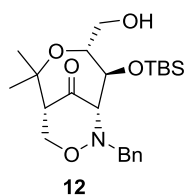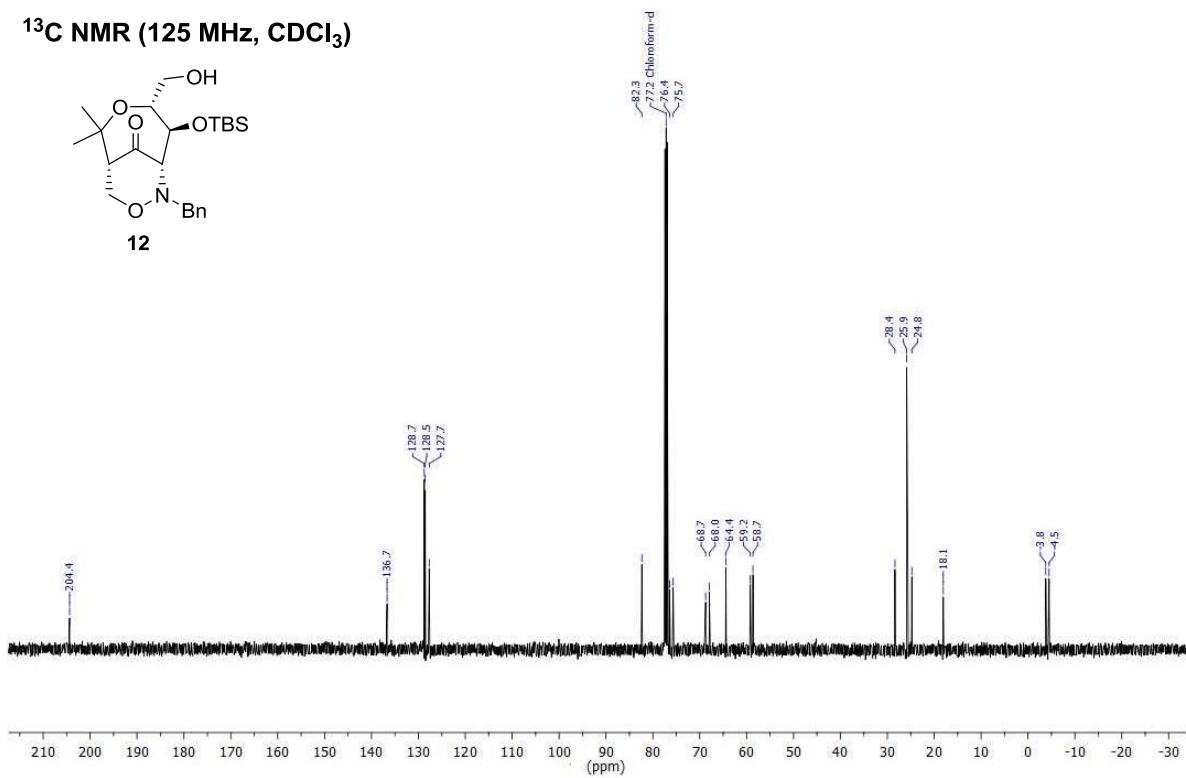

**<sup>1</sup>H NMR (500 MHz, CDCl<sub>3</sub>)**

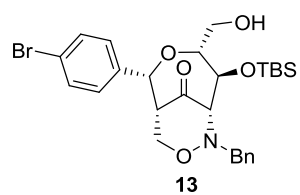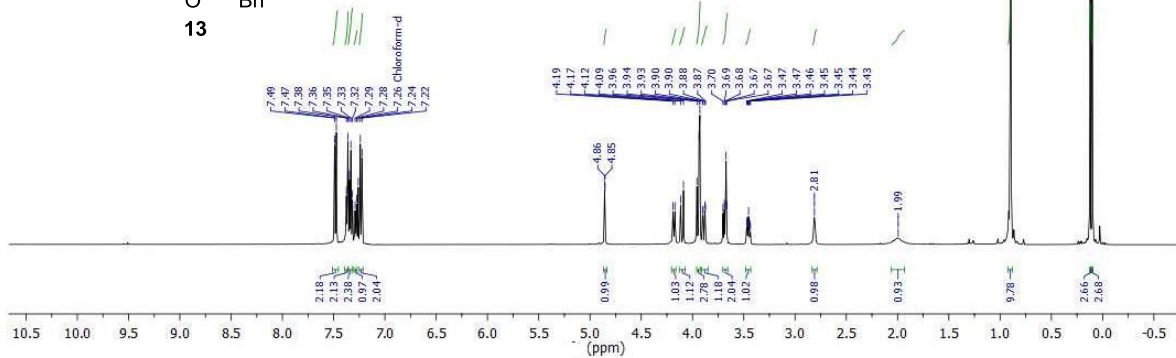

**<sup>13</sup>C NMR (125 MHz, CDCl<sub>3</sub>)**

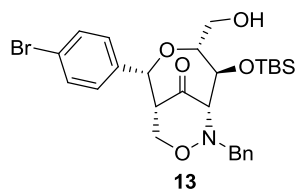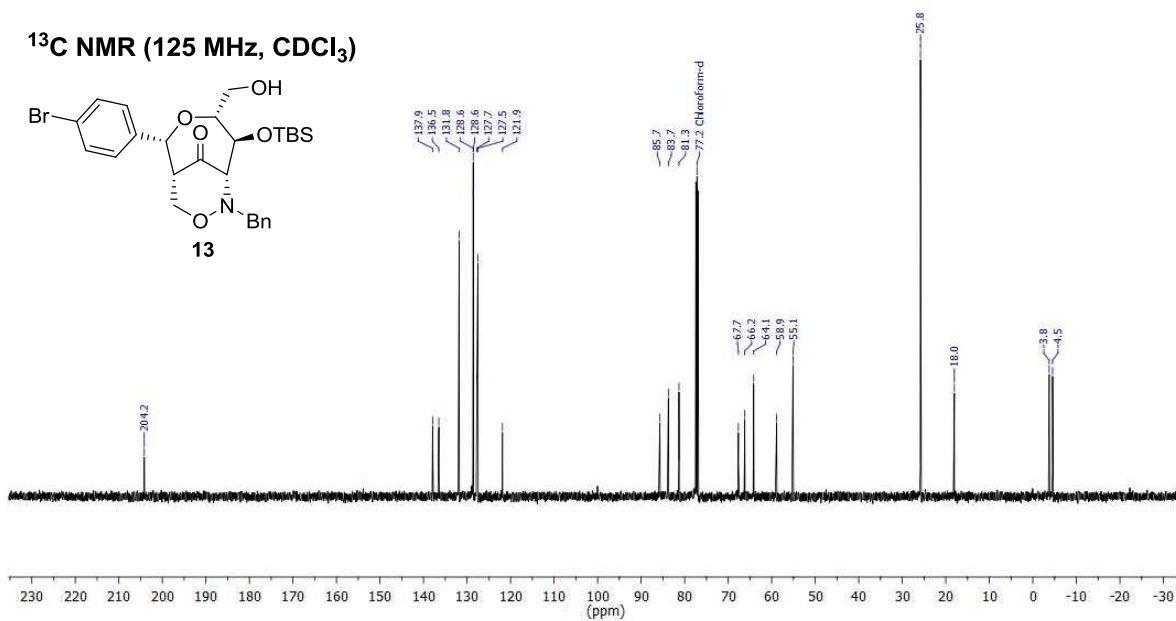

**<sup>1</sup>H NMR (700 MHz, CDCl<sub>3</sub>)**

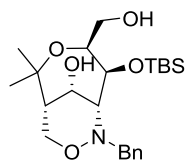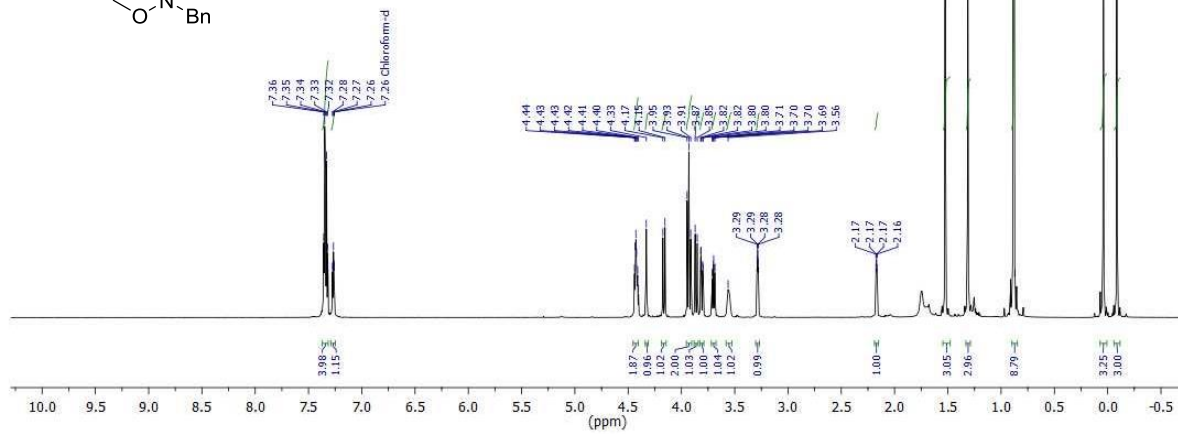

**<sup>13</sup>C NMR (175 MHz, CDCl<sub>3</sub>)**

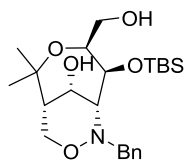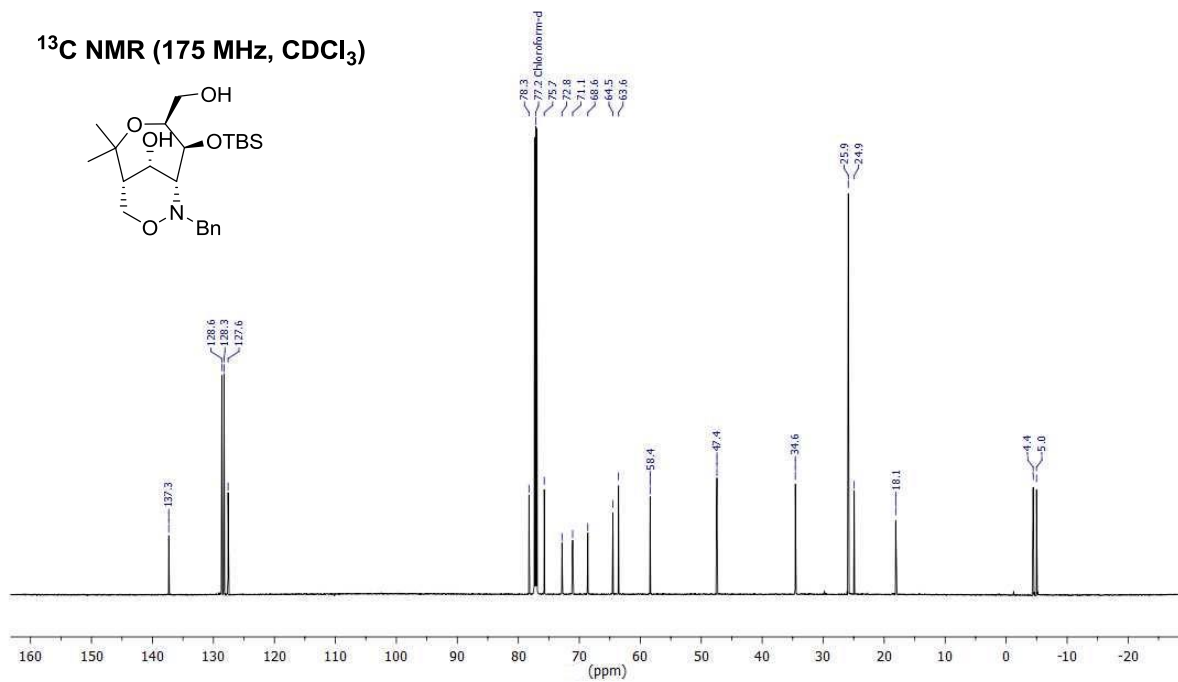

**<sup>1</sup>H NMR (500 MHz, CDCl<sub>3</sub>)**

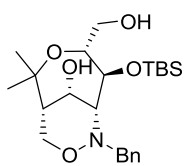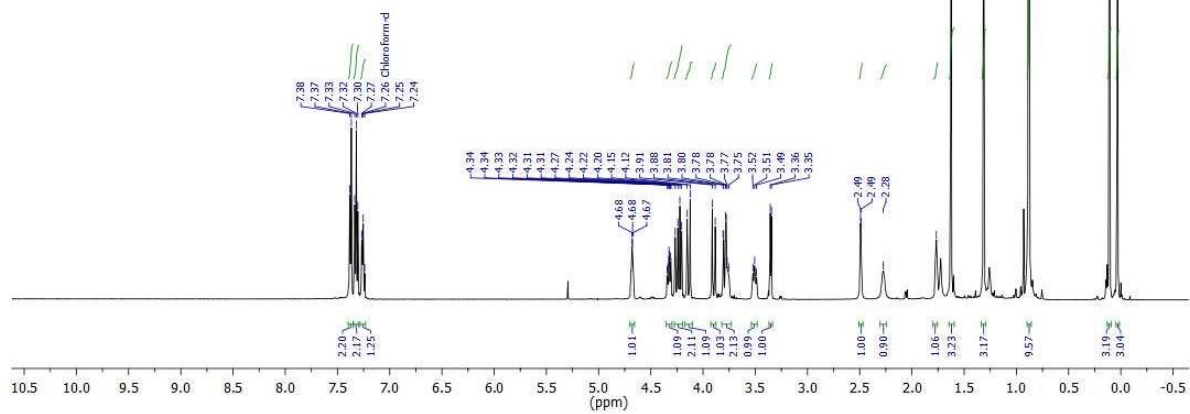

**<sup>13</sup>C NMR (125 MHz, CDCl<sub>3</sub>)**

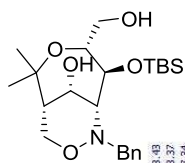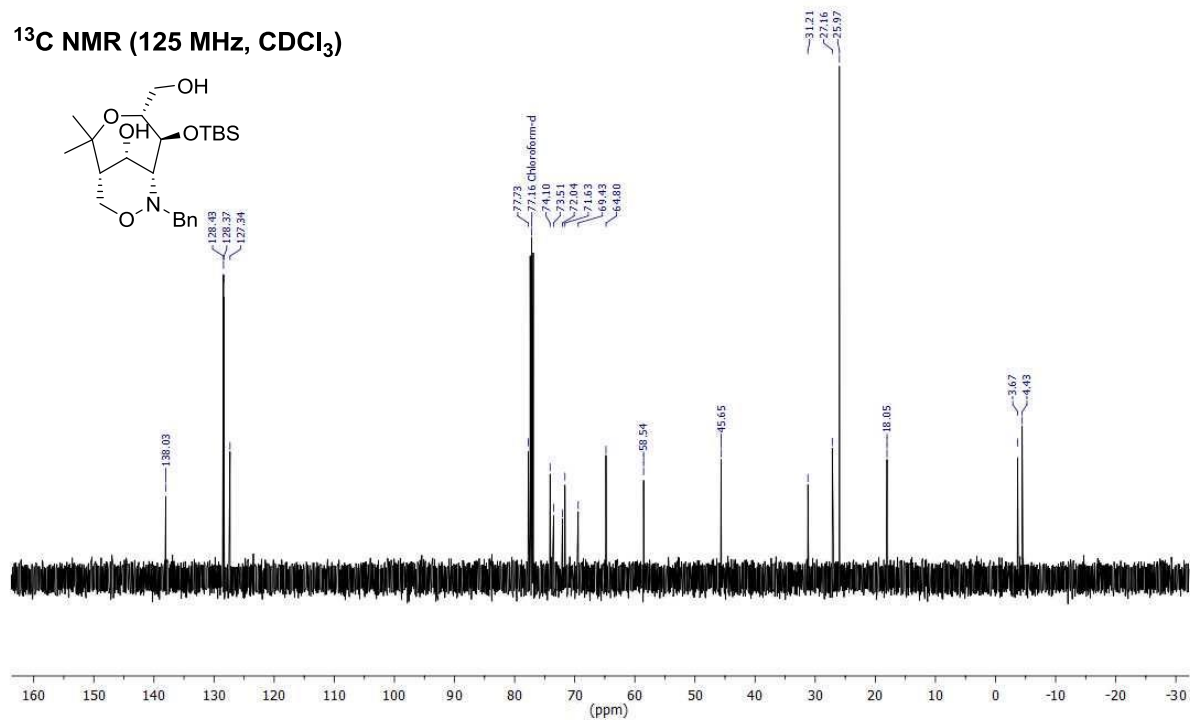

**<sup>1</sup>H NMR (500 MHz, CDCl<sub>3</sub>)**

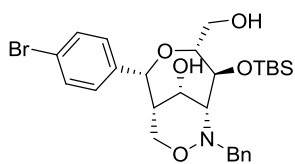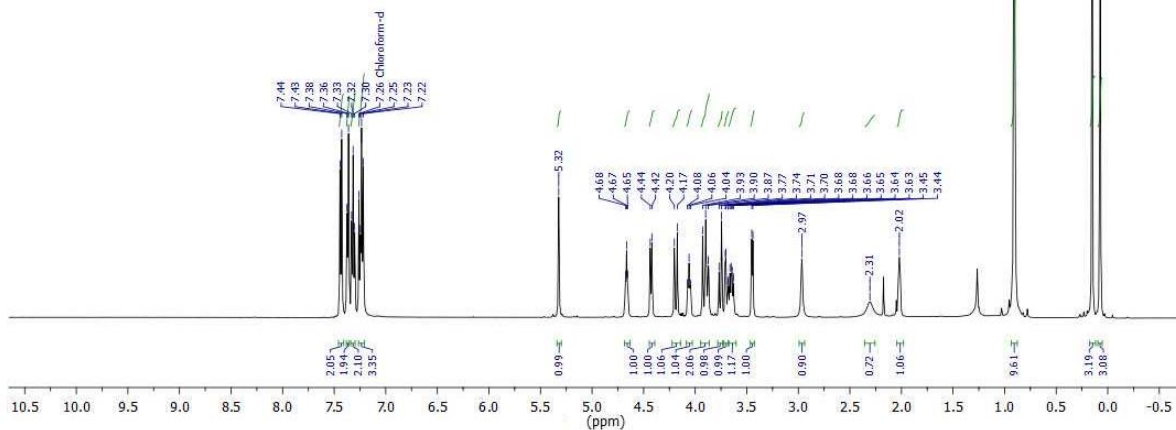

**<sup>13</sup>C NMR (125 MHz, CDCl<sub>3</sub>)**

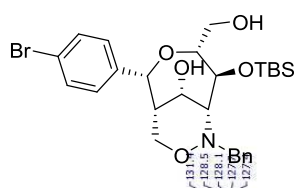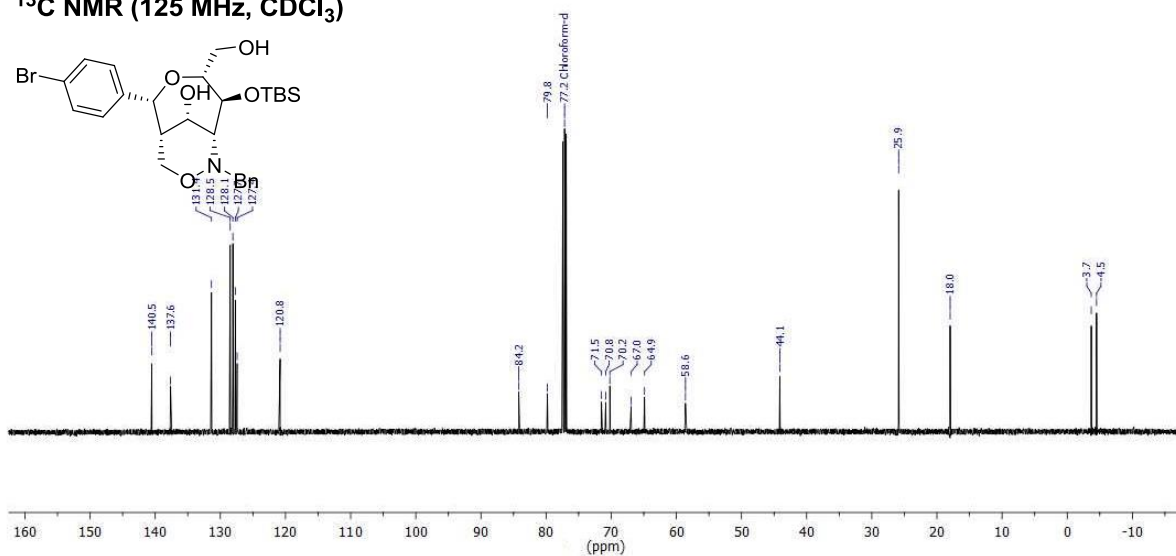

**<sup>1</sup>H NMR (700 MHz, CD<sub>3</sub>OD)**

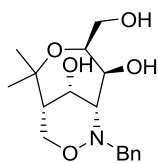

**14**

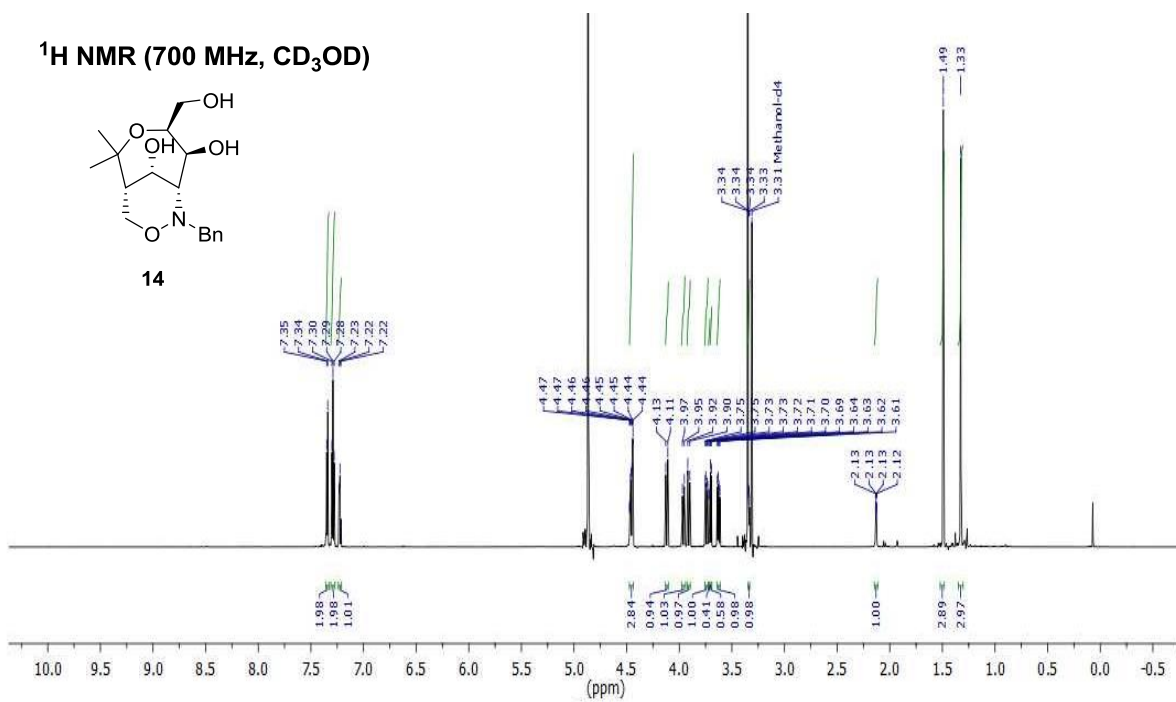

**<sup>13</sup>C NMR (175 MHz, CD<sub>3</sub>OD)**

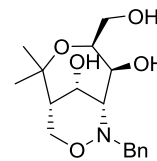

**14**

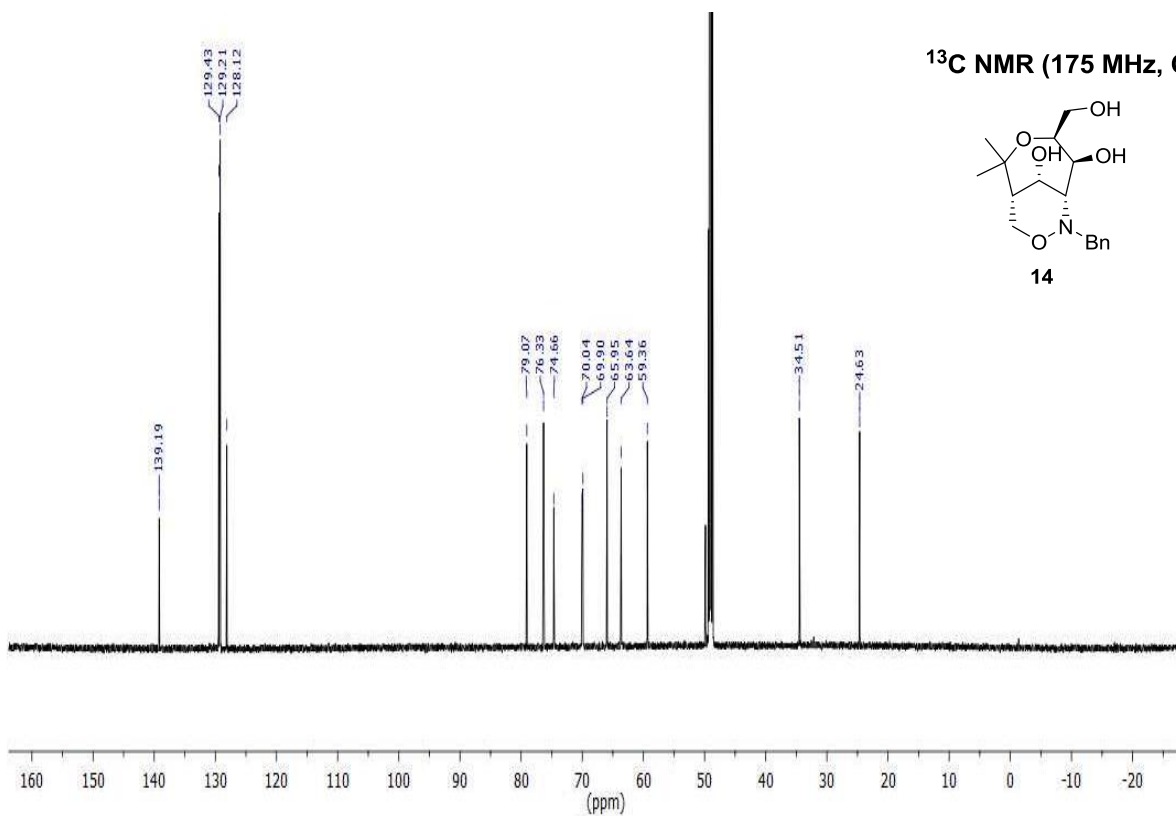

**<sup>1</sup>H NMR (700 MHz, CD<sub>3</sub>OD)**

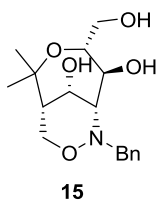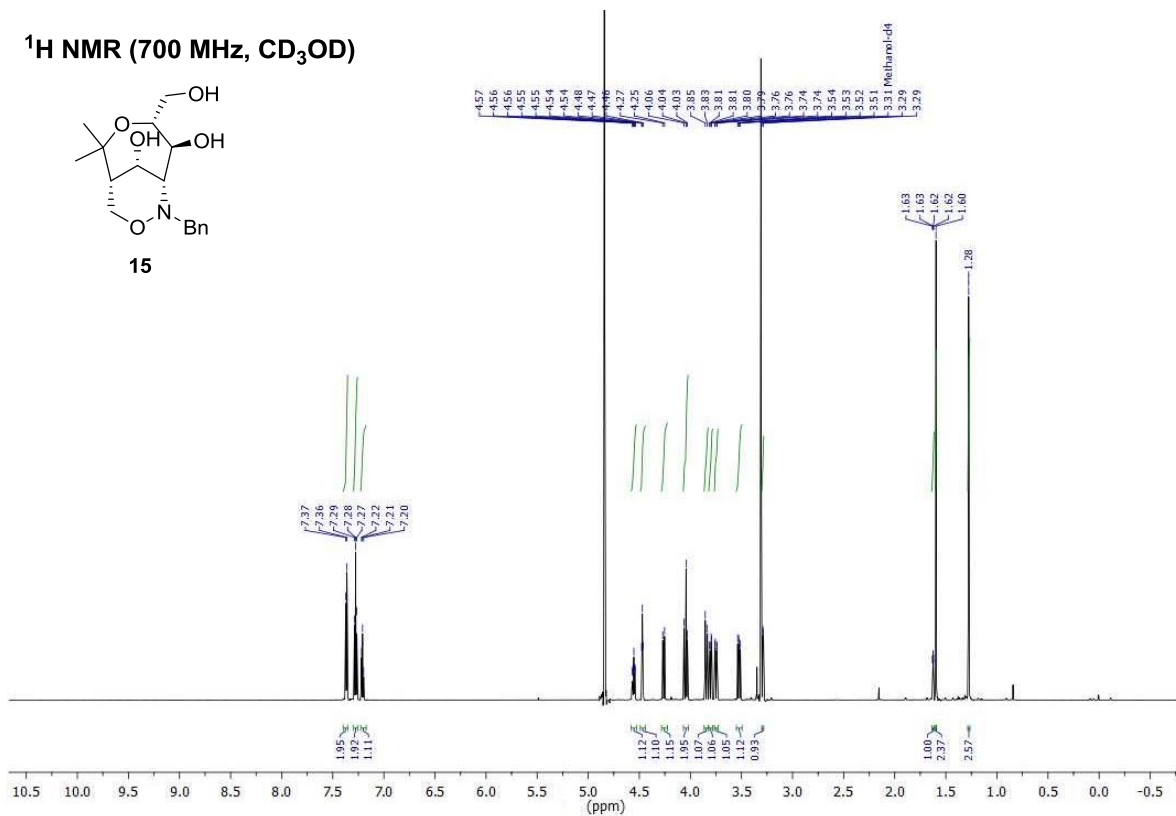

**<sup>13</sup>C NMR (175 MHz, CD<sub>3</sub>OD)**

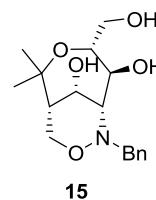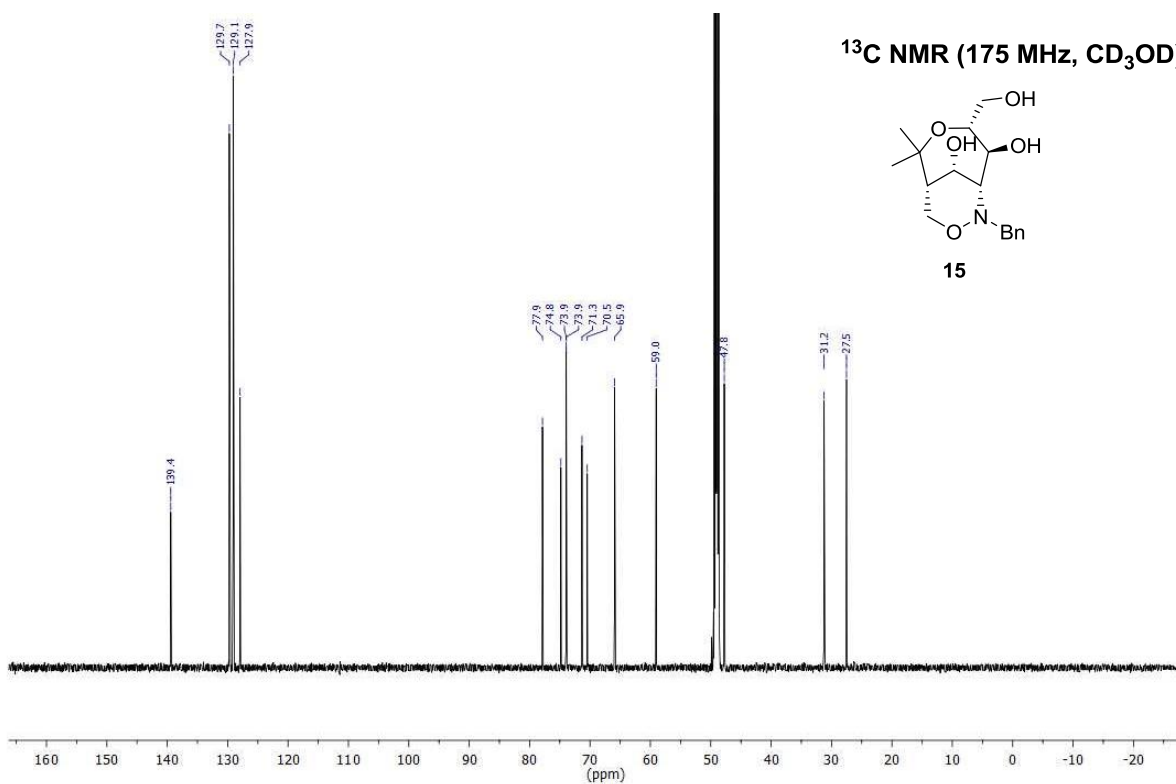



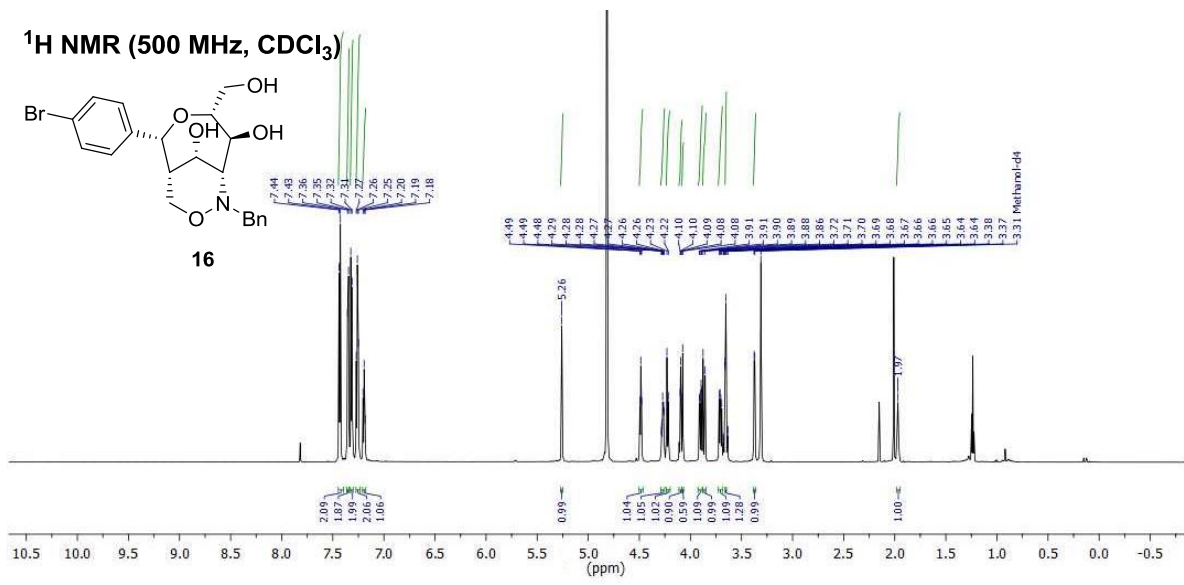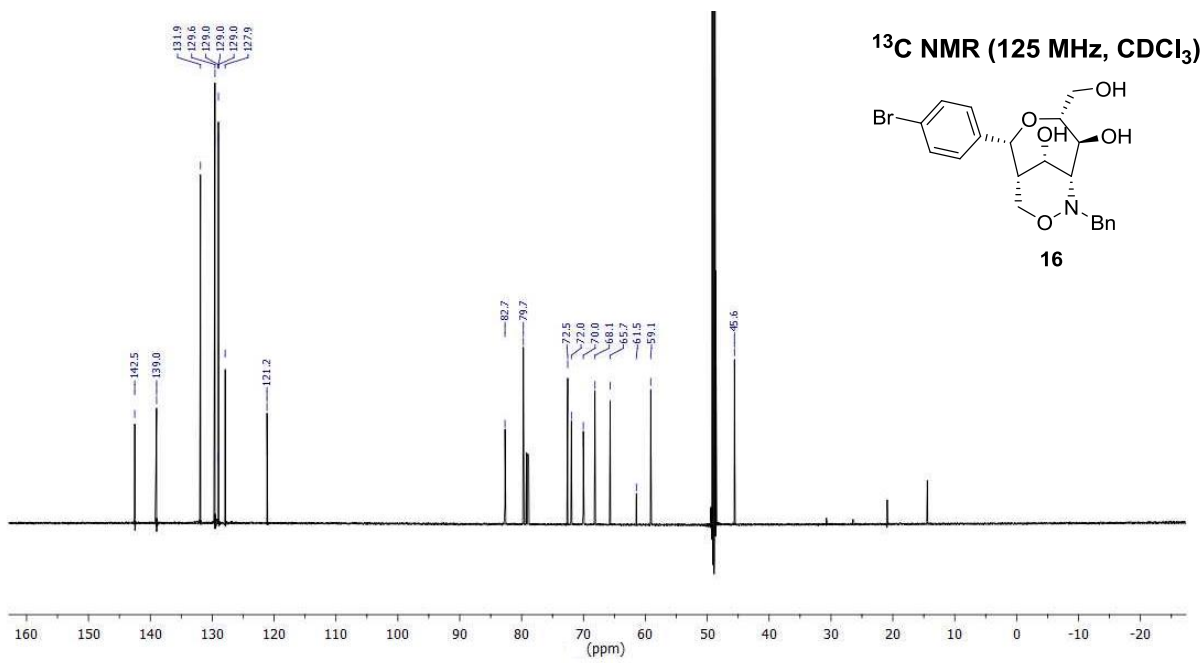



**<sup>1</sup>H NMR (500 MHz, CDCl<sub>3</sub>)**

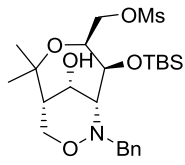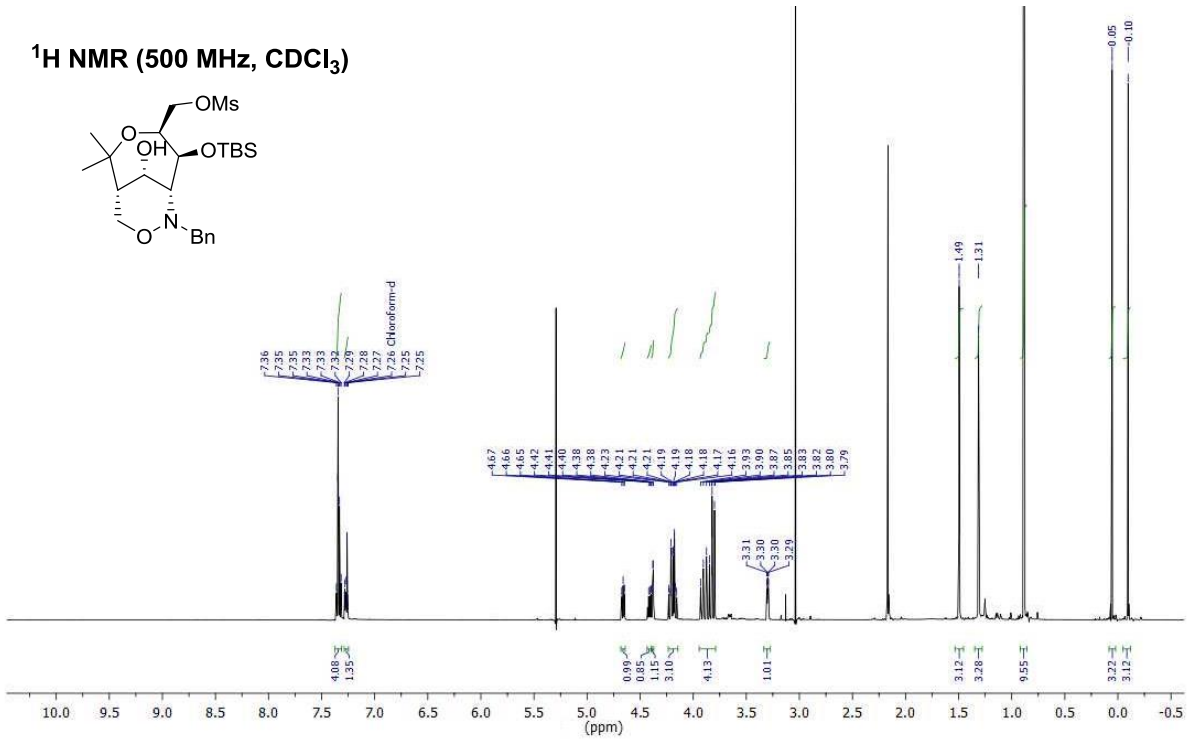

**<sup>13</sup>C NMR (125 MHz, CDCl<sub>3</sub>)**

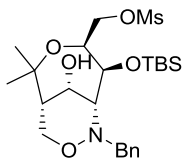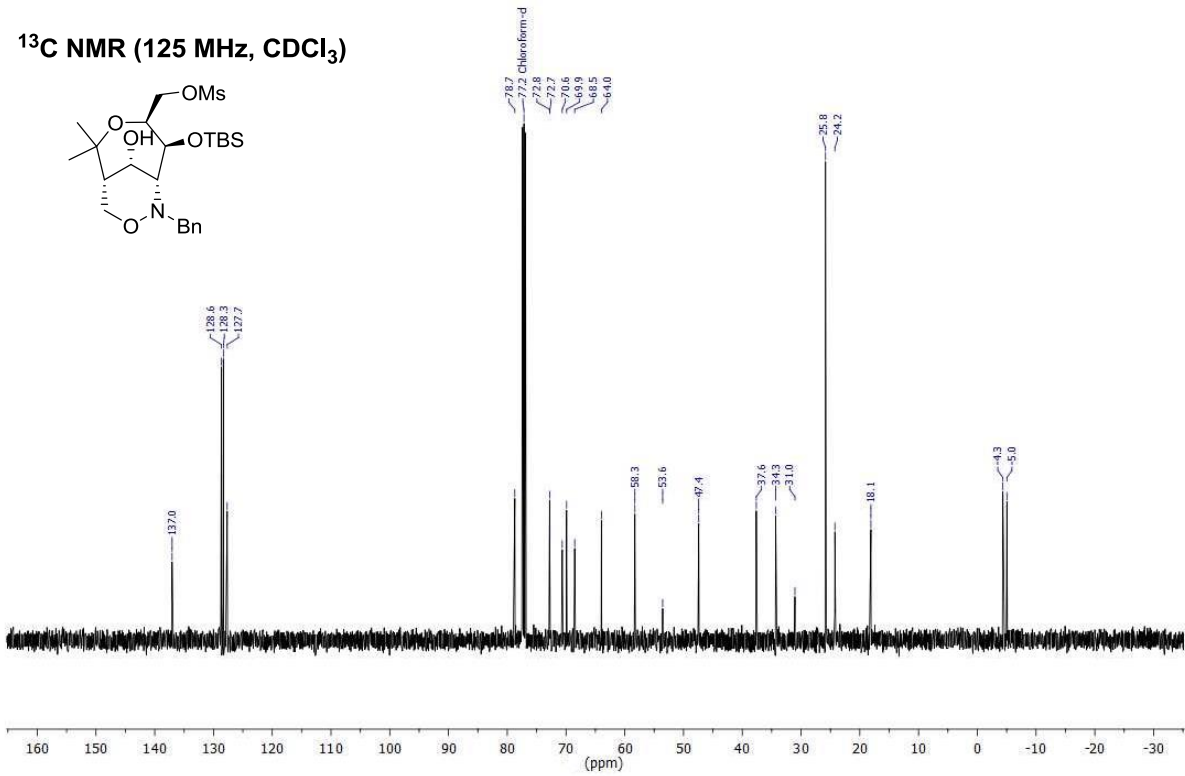

**<sup>1</sup>H NMR (500 MHz, CDCl<sub>3</sub>)**

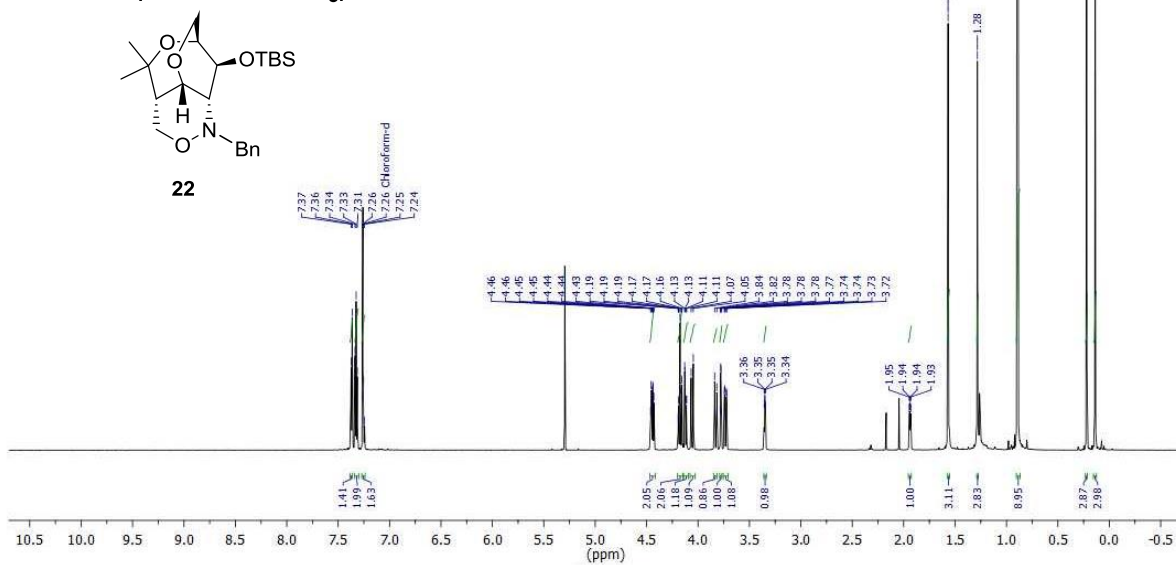

**<sup>13</sup>C NMR (125 MHz, CDCl<sub>3</sub>)**

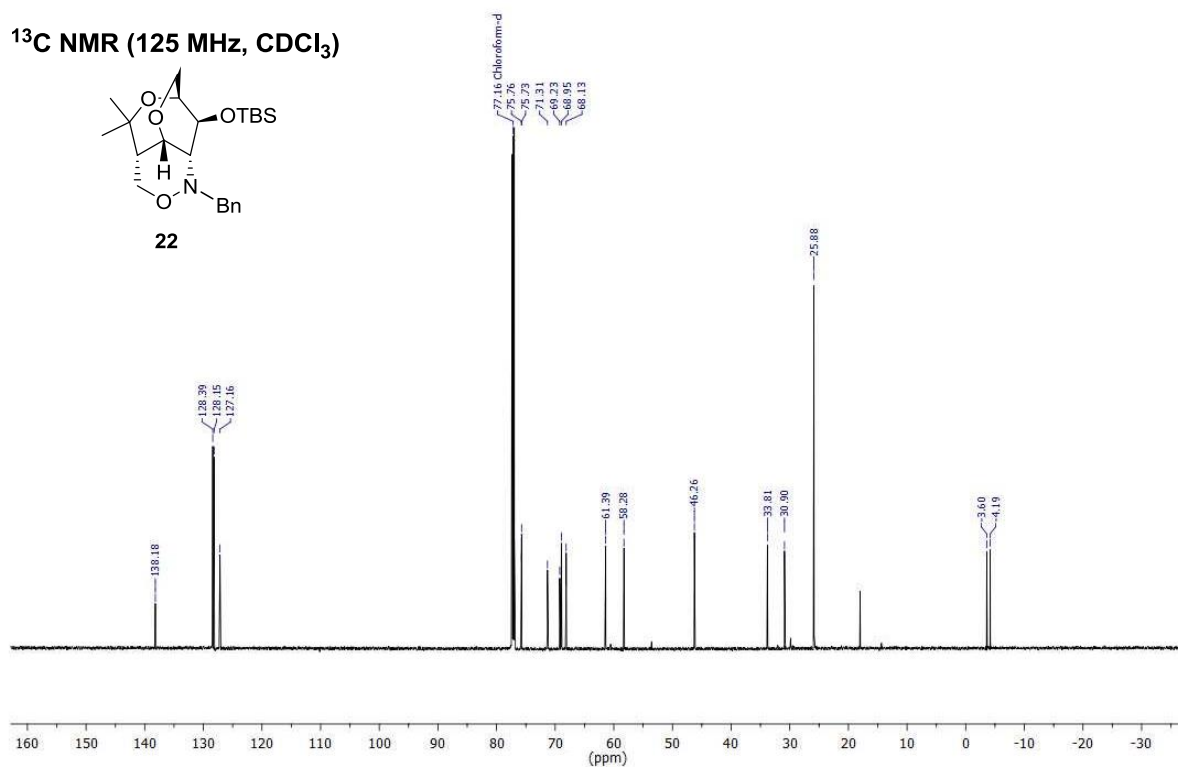

**<sup>1</sup>H NMR (500 MHz, CDCl<sub>3</sub>)**

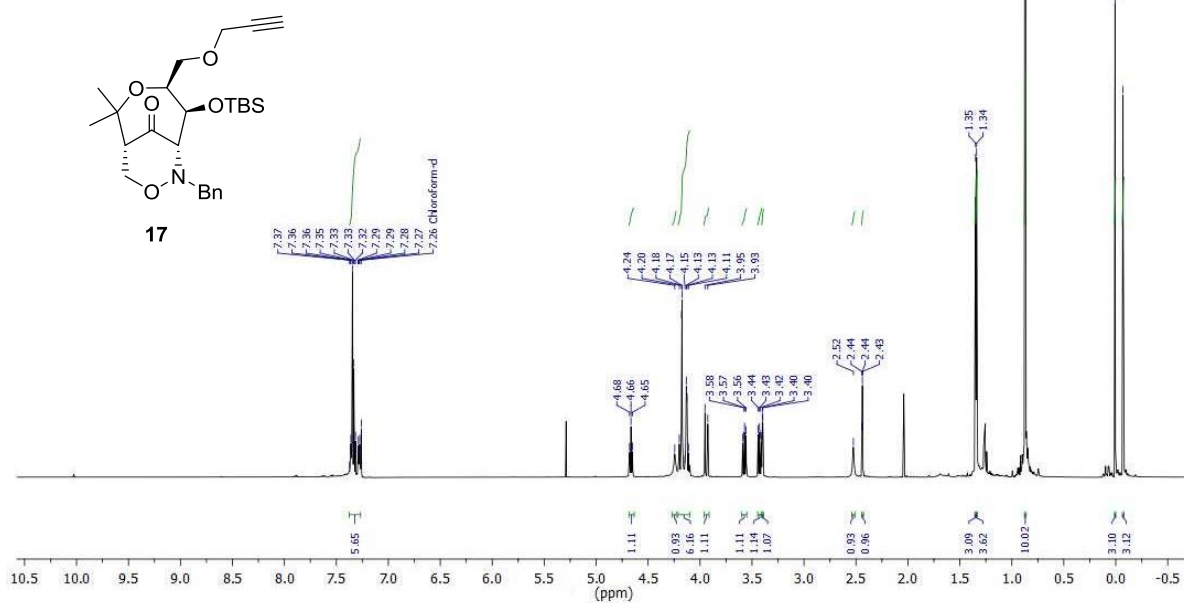

**<sup>13</sup>C NMR (125 MHz, CDCl<sub>3</sub>)**

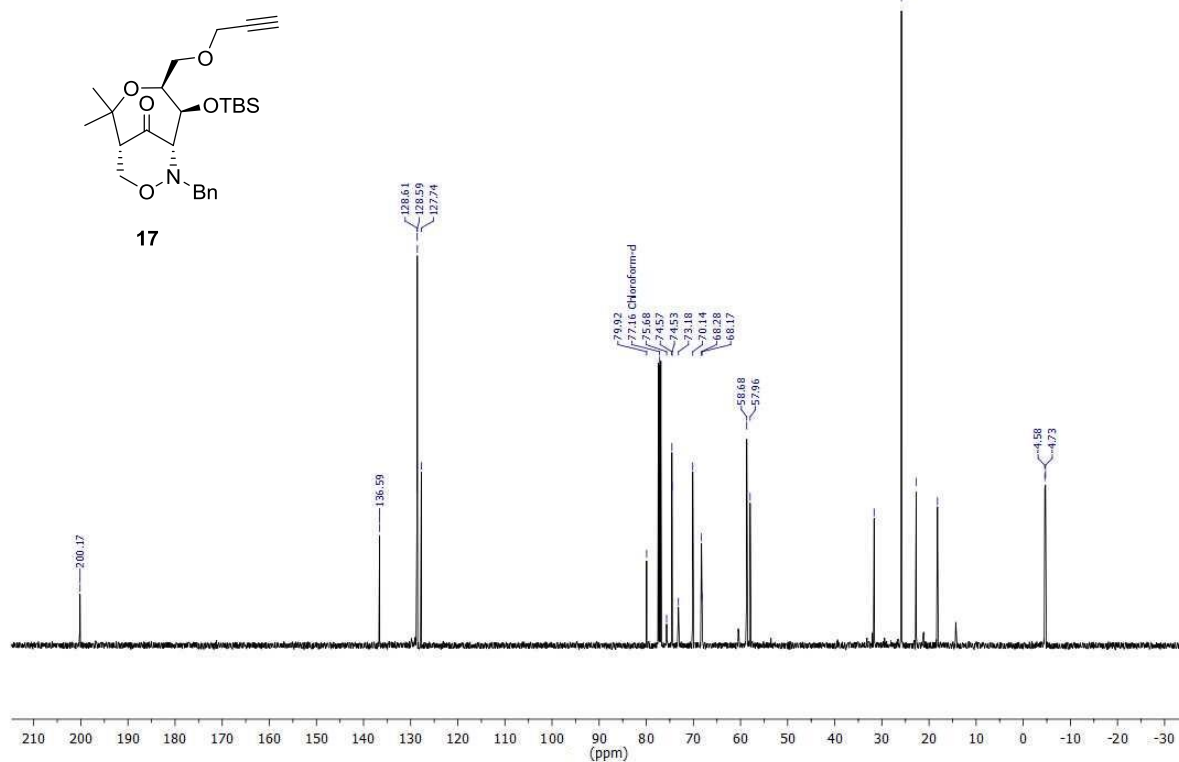

**<sup>1</sup>H NMR (500 MHz, CDCl<sub>3</sub>)**

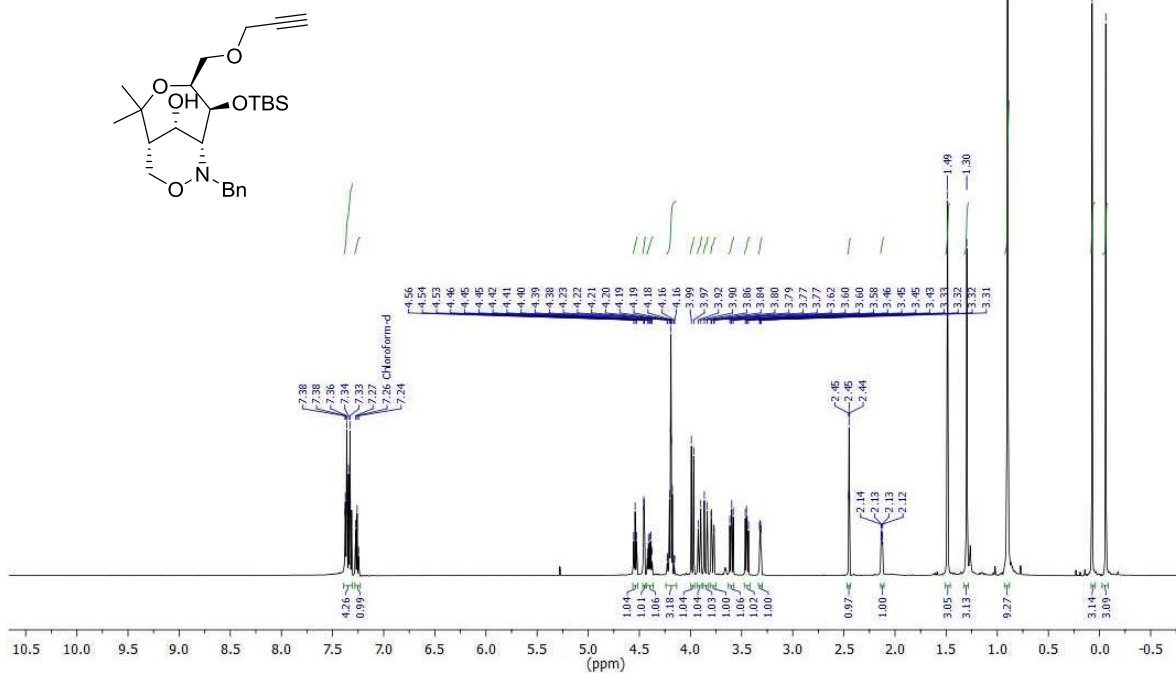

**<sup>13</sup>C NMR (125 MHz, CDCl<sub>3</sub>)**

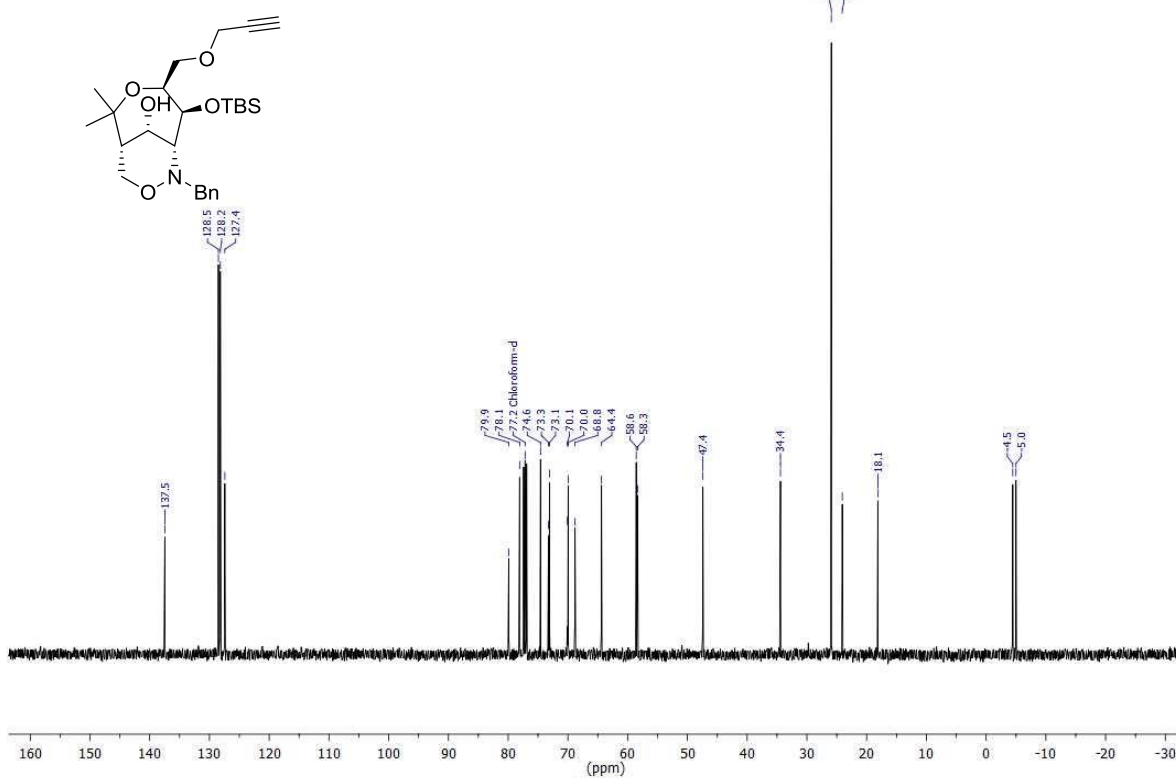

<sup>1</sup>H NMR (500 MHz, CDCl<sub>3</sub>)

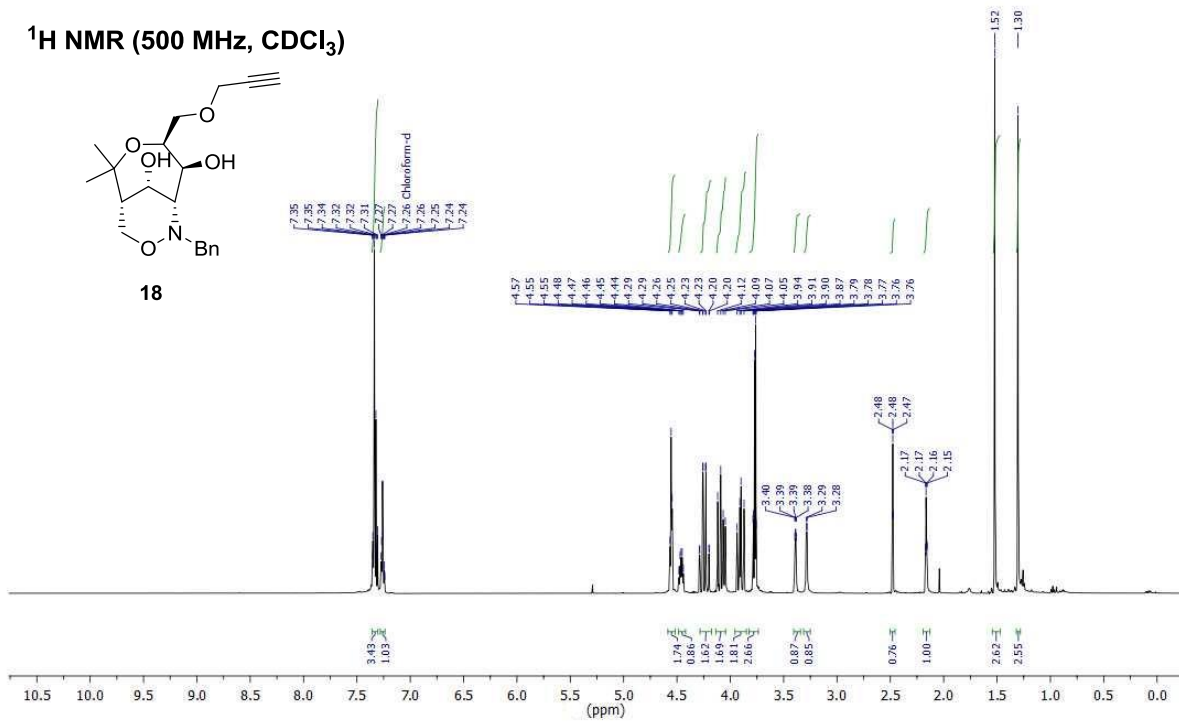

<sup>13</sup>C NMR (125 MHz, CDCl<sub>3</sub>)

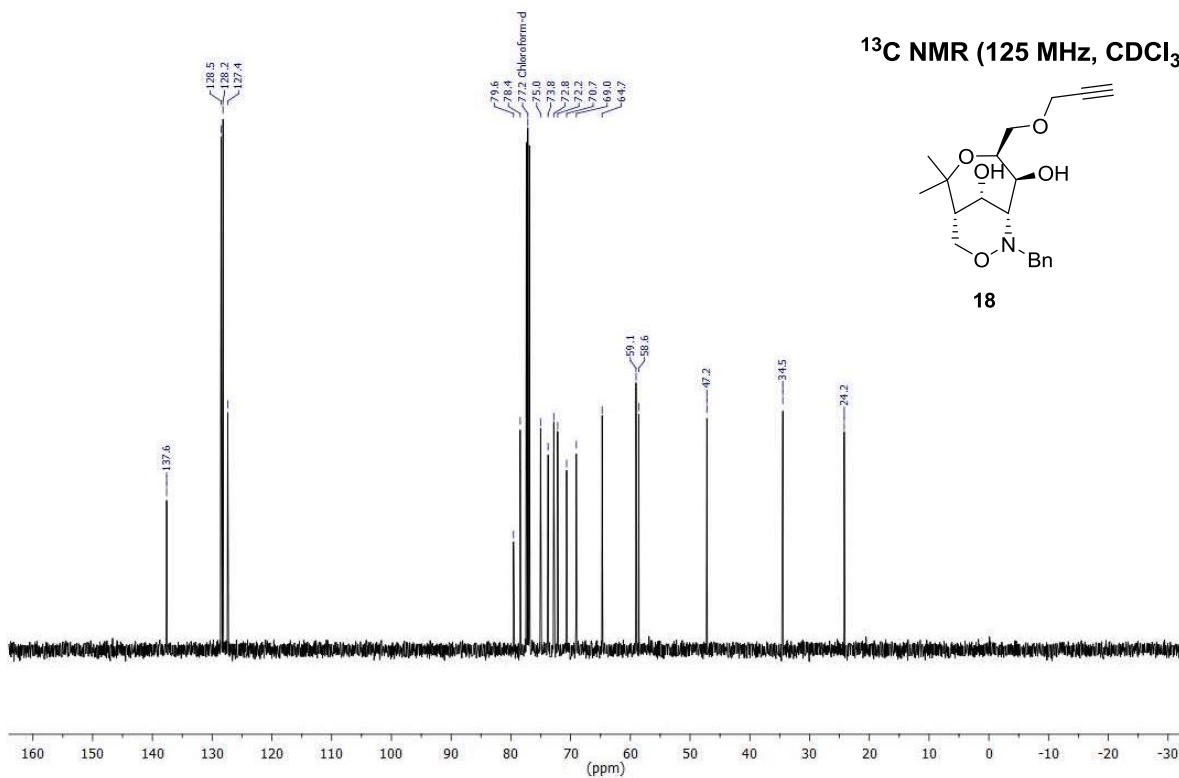





**<sup>1</sup>H NMR (700 MHz, CDCl<sub>3</sub>)**

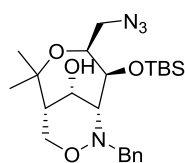

**21**

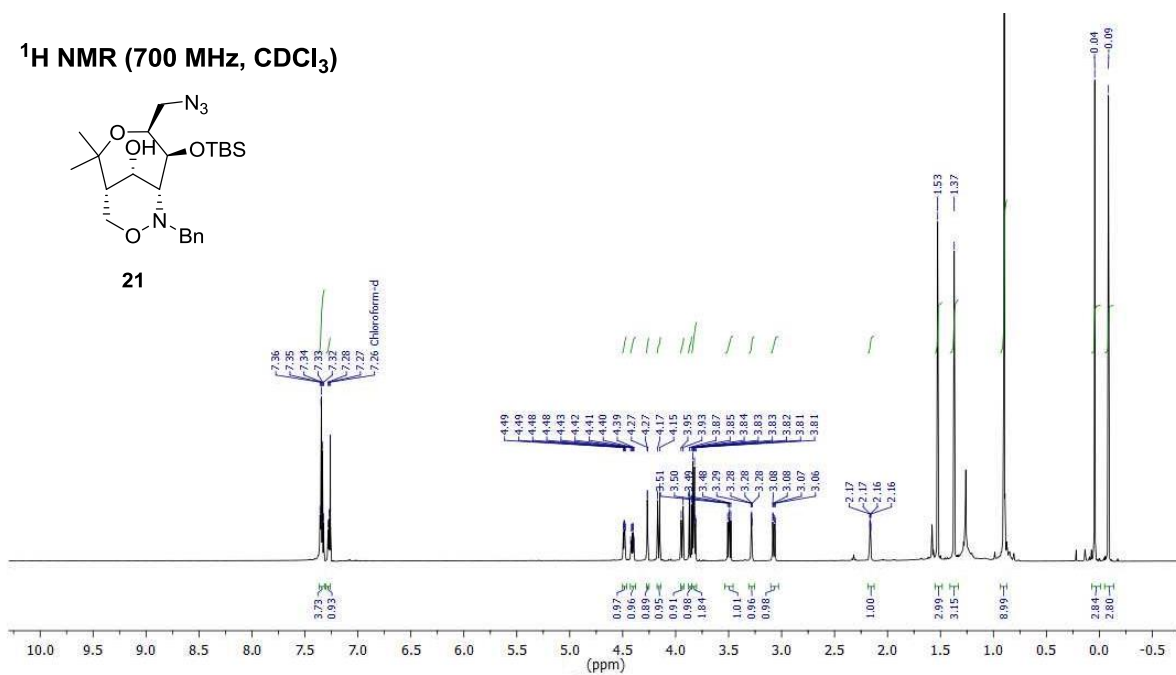

**<sup>13</sup>C NMR (175 MHz, CDCl<sub>3</sub>)**

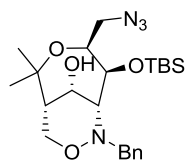

**21**

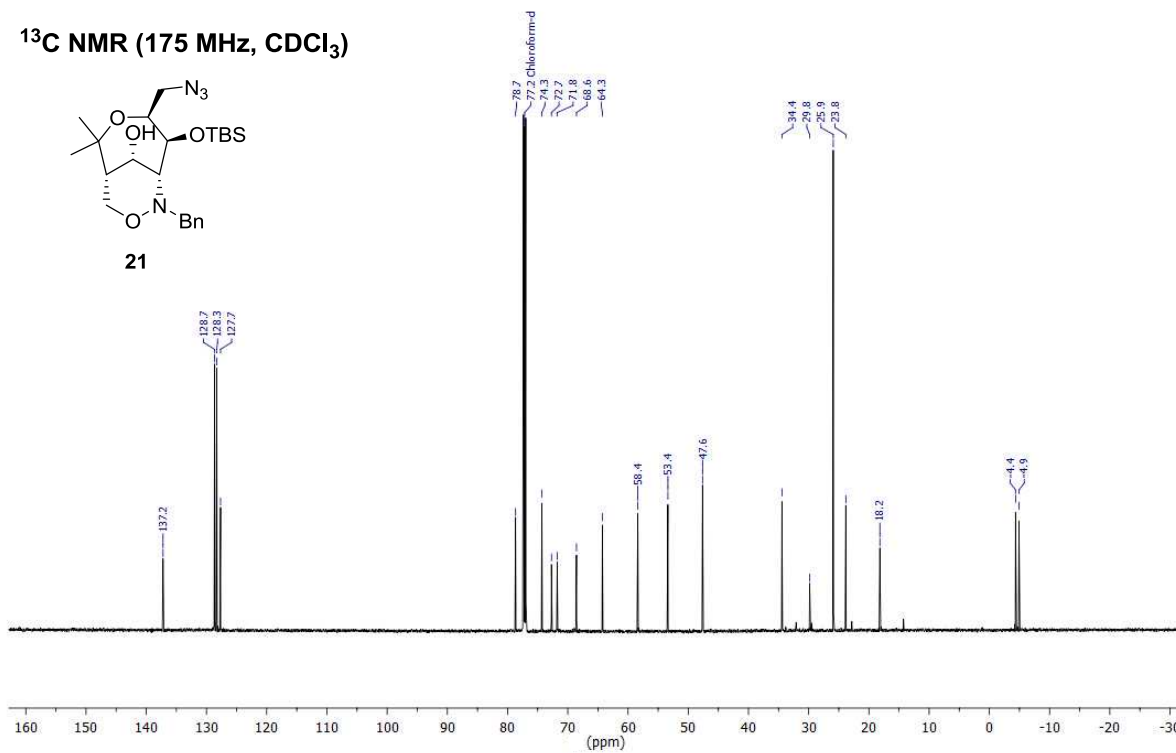

**<sup>1</sup>H NMR (500 MHz, CDCl<sub>3</sub>)**

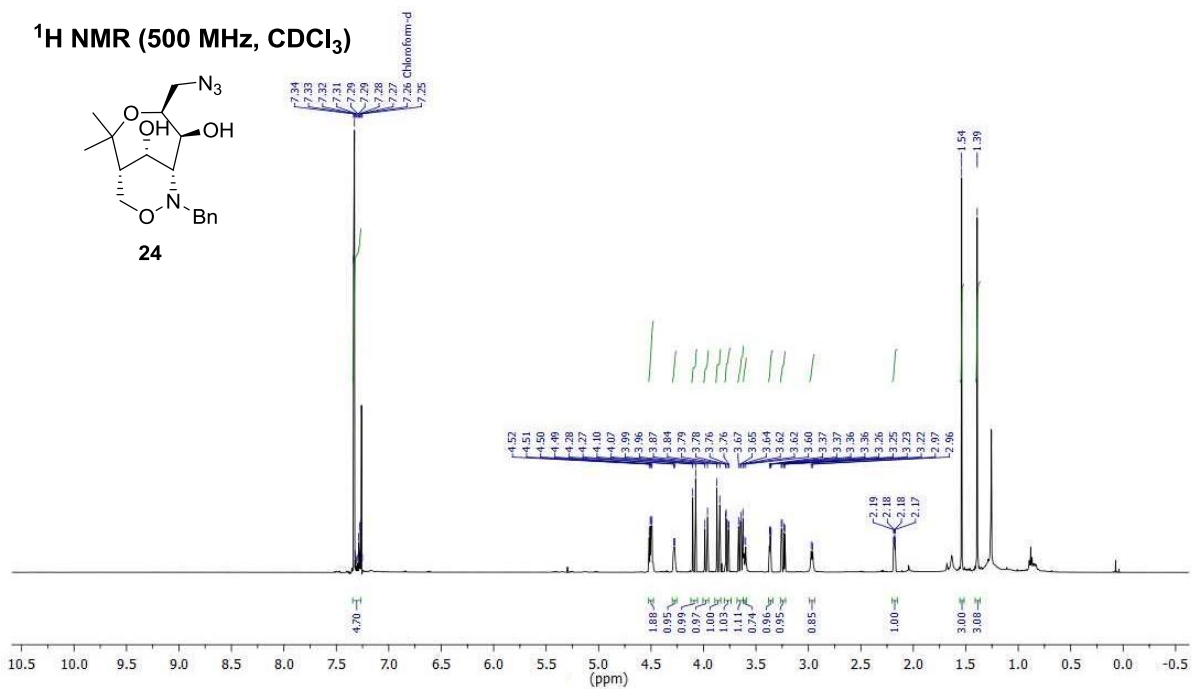

**<sup>13</sup>C NMR (125 MHz, CDCl<sub>3</sub>)**

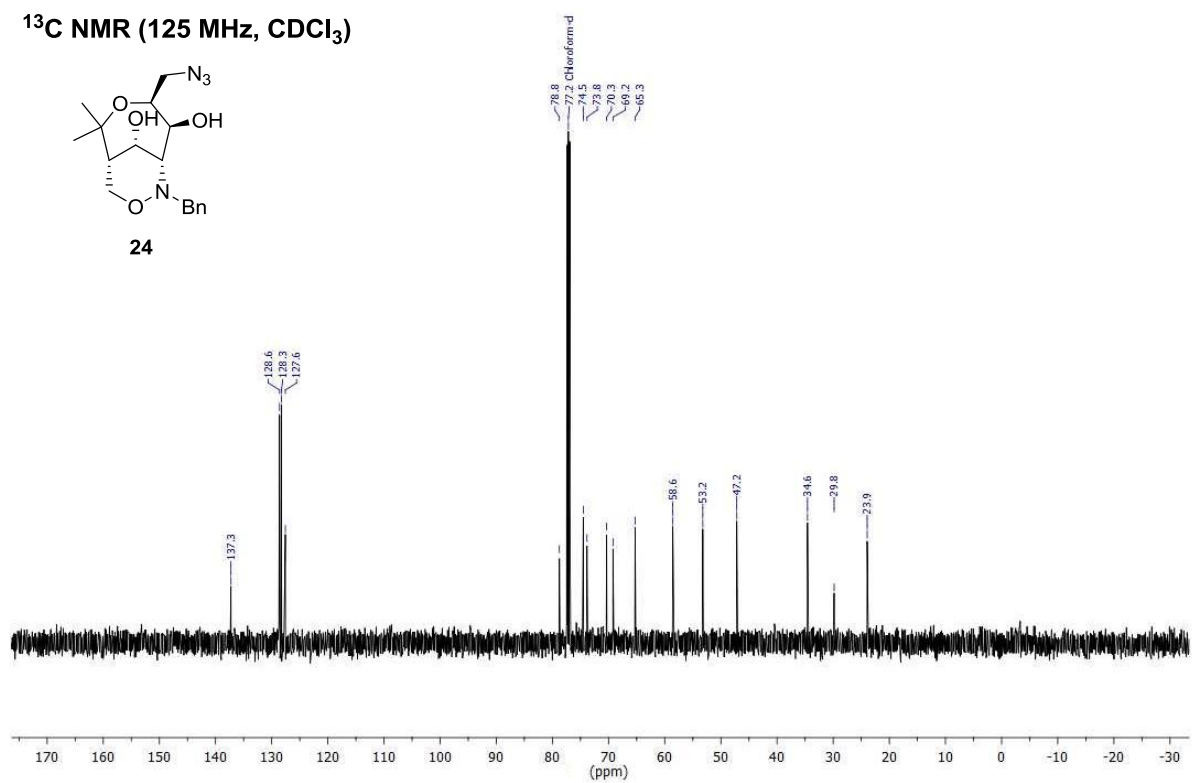

**<sup>1</sup>H NMR (500 MHz, CDCl<sub>3</sub>)**

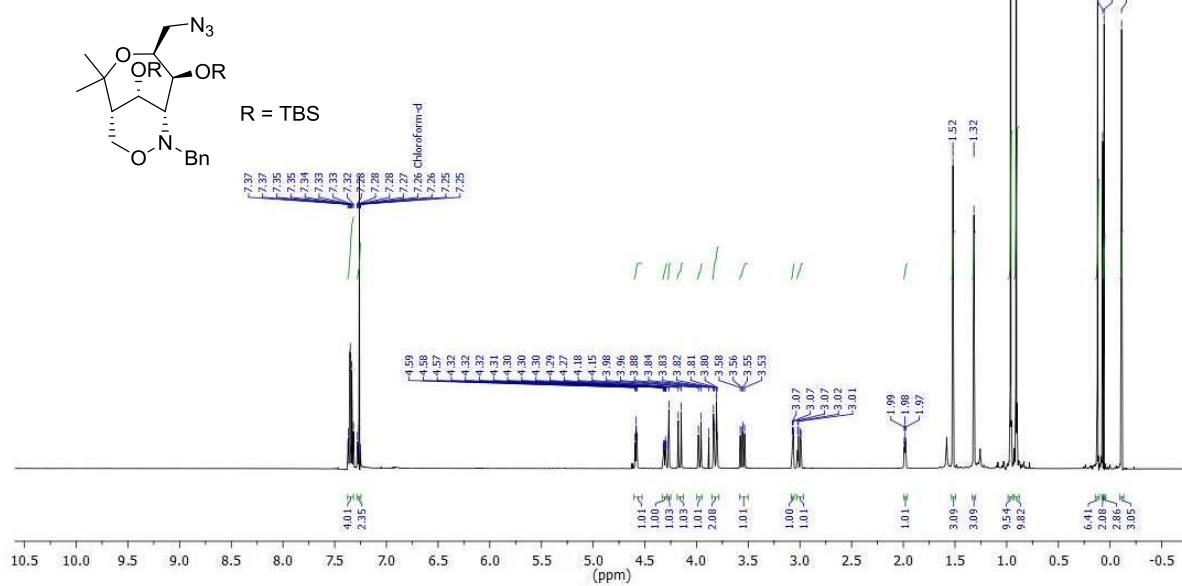

**<sup>13</sup>C NMR (125 MHz, CDCl<sub>3</sub>)**

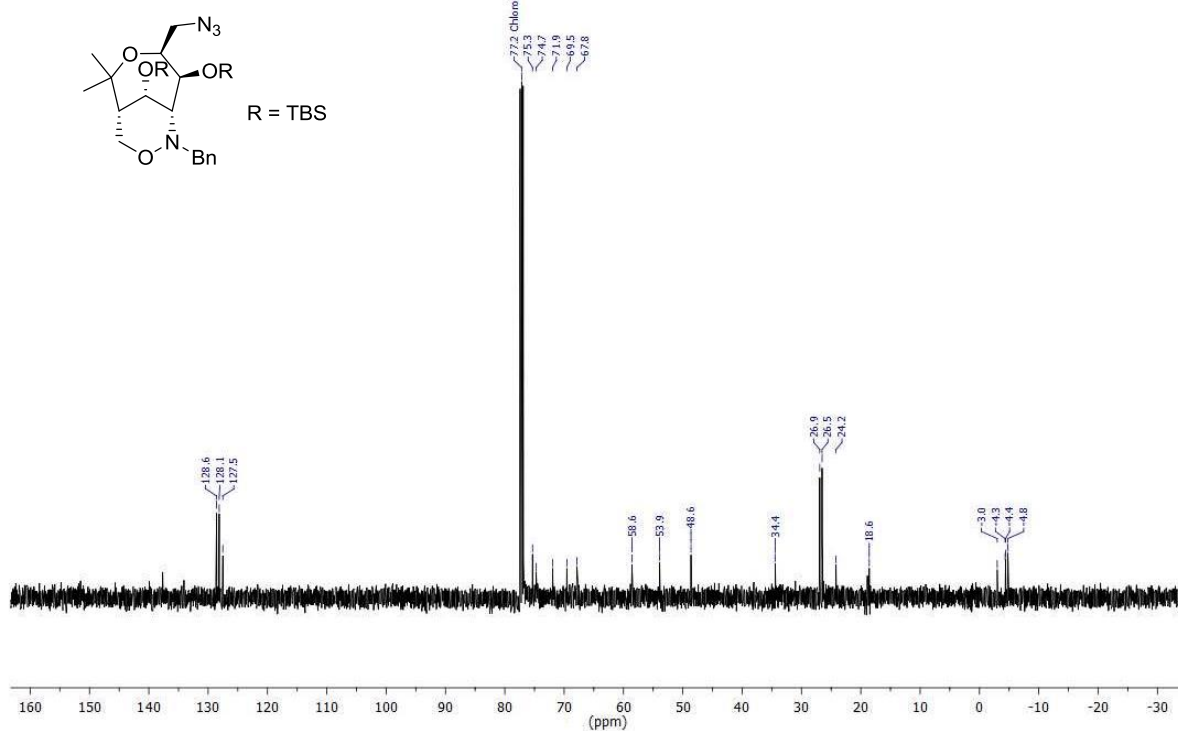

**<sup>1</sup>H NMR (500 MHz, CDCl<sub>3</sub>)**

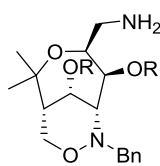

R = TBS

**25**

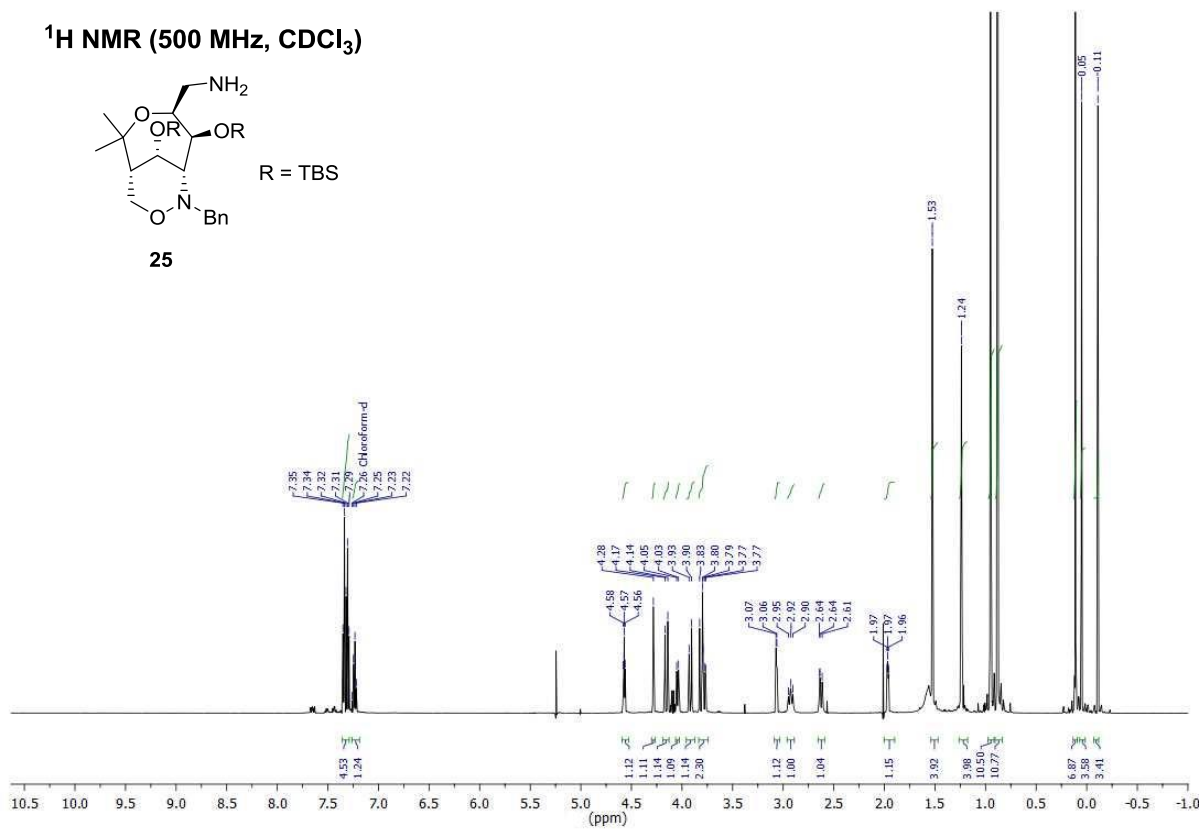

**<sup>13</sup>C NMR (125 MHz, CDCl<sub>3</sub>)**

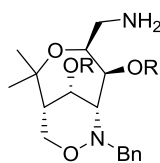

R = TBS

**25**

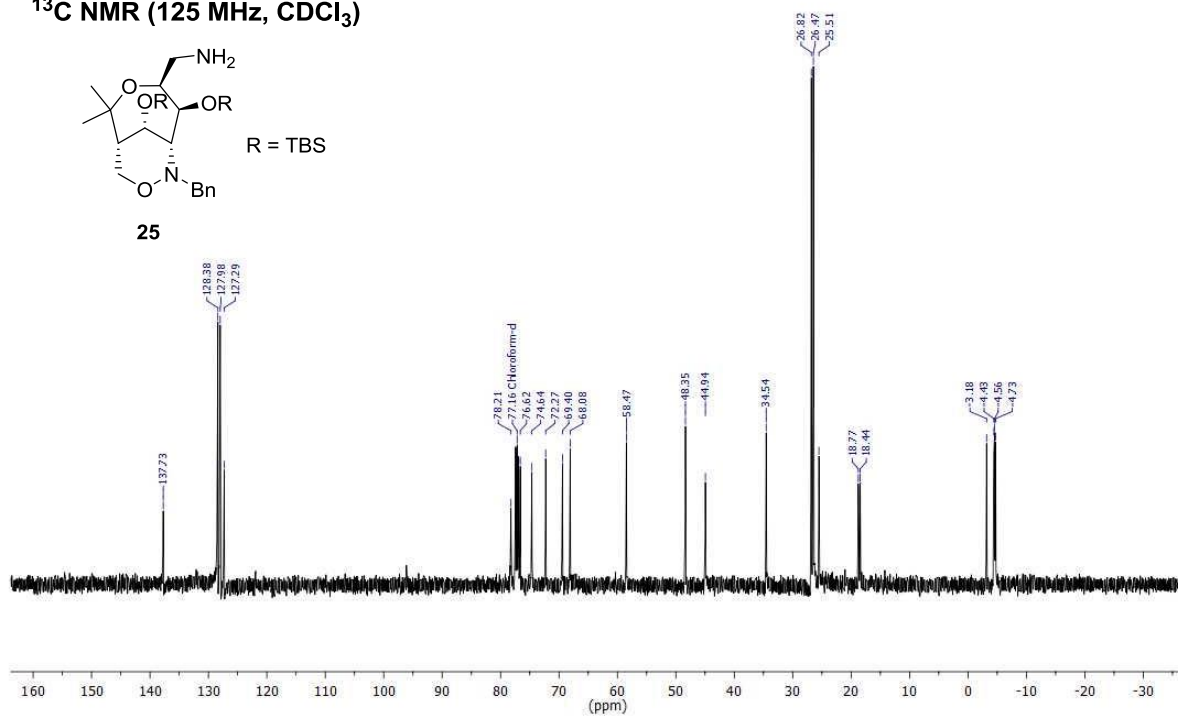

**<sup>1</sup>H NMR (700 MHz, CD<sub>3</sub>OD)**

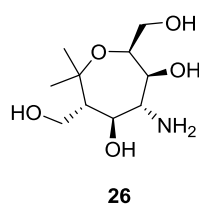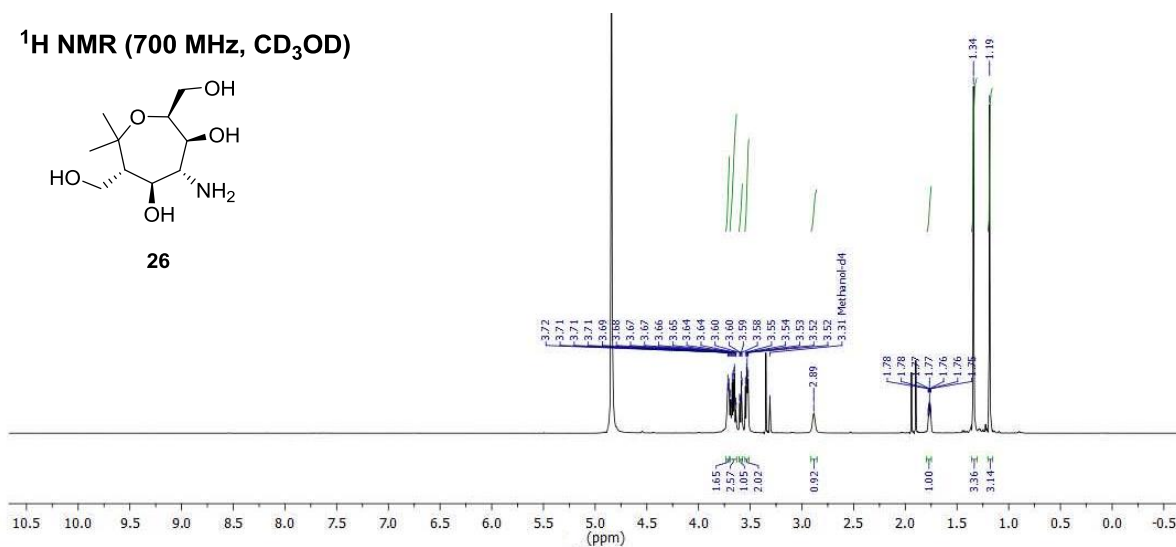

**<sup>13</sup>C NMR (175 MHz, CD<sub>3</sub>OD)**

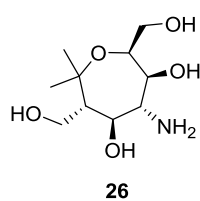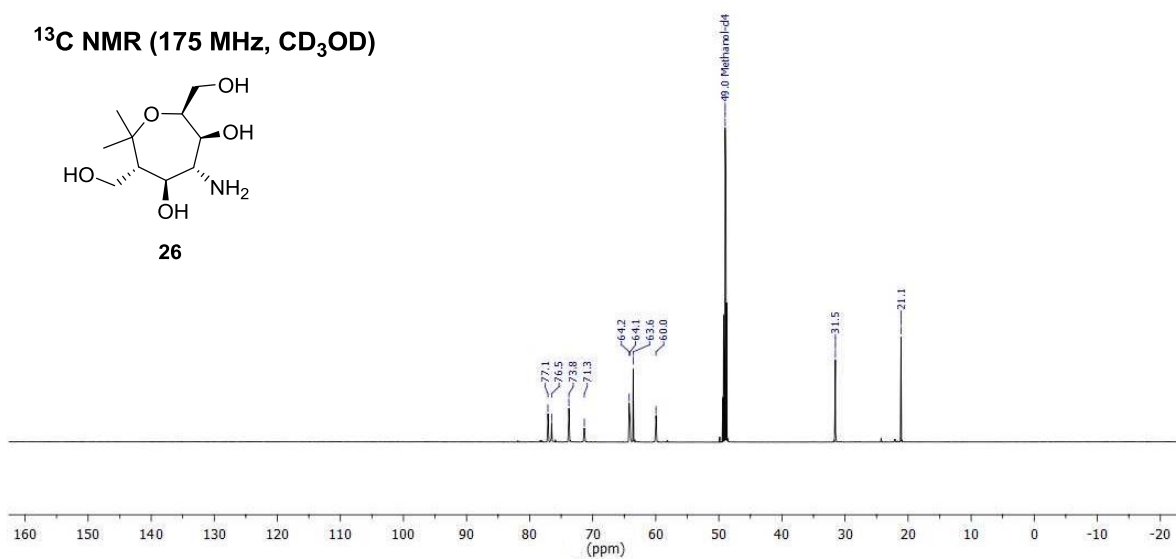

<sup>1</sup>H NMR (700 MHz, CD<sub>3</sub>OD)

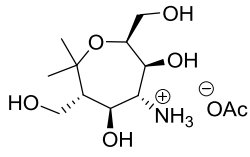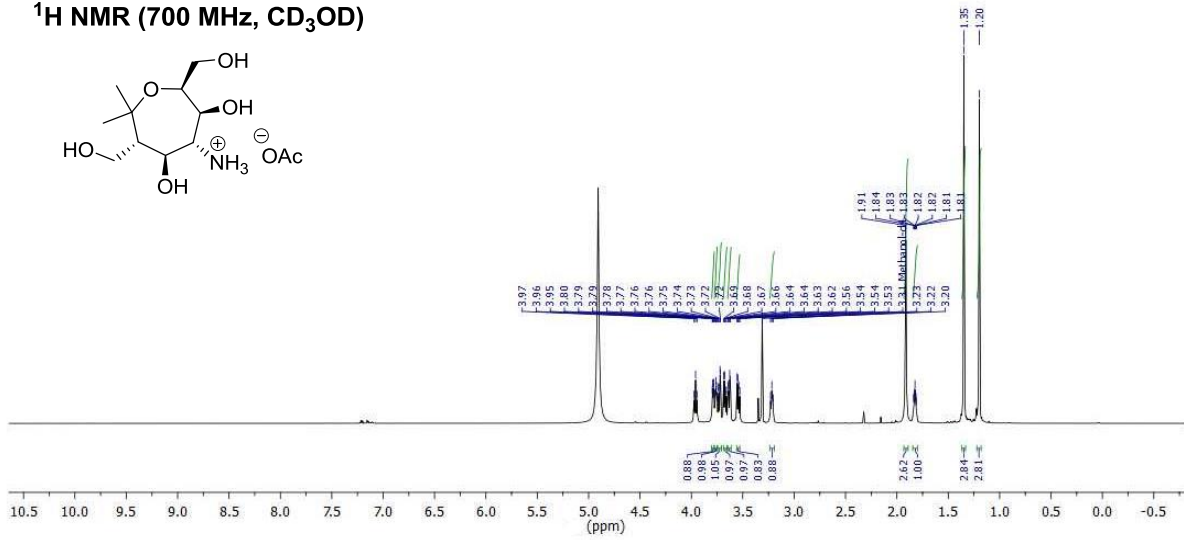

<sup>13</sup>C NMR (175 MHz, CD<sub>3</sub>OD)

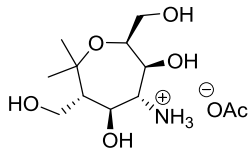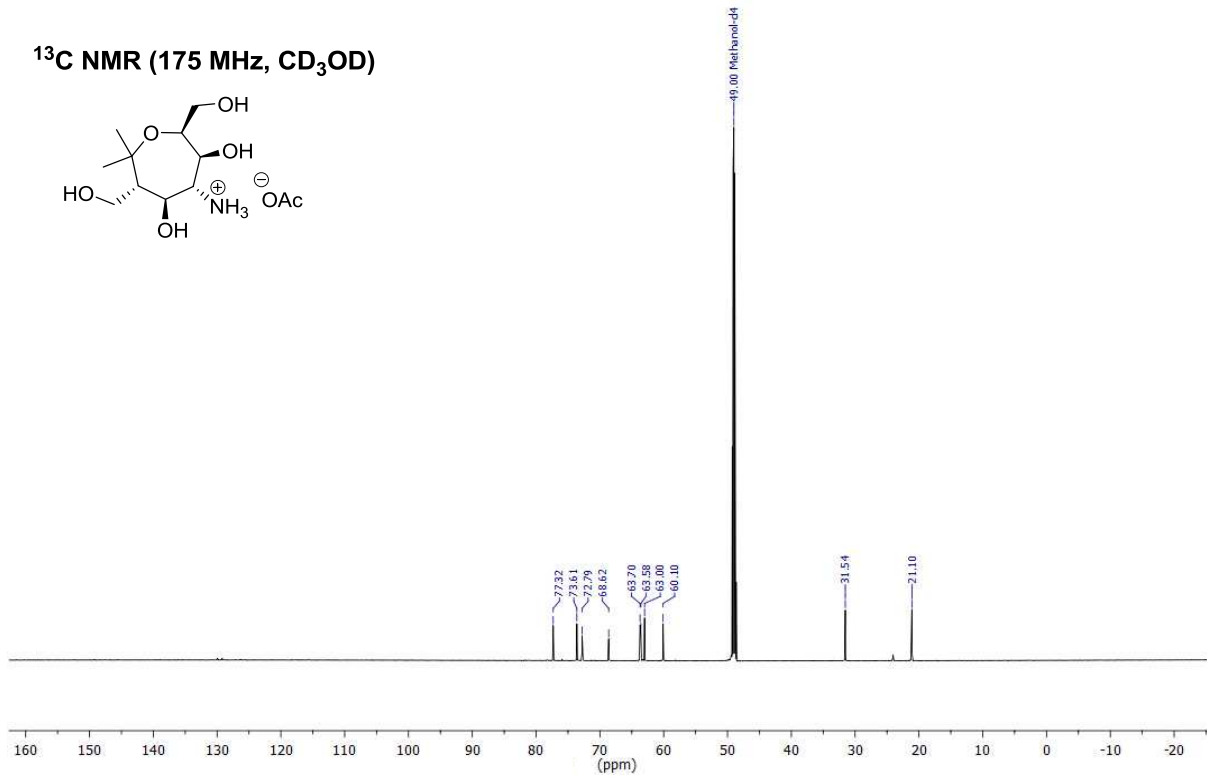

**<sup>1</sup>H NMR (700 MHz, CD<sub>3</sub>OD)**

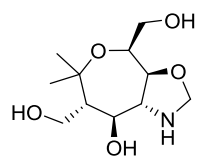

**29**

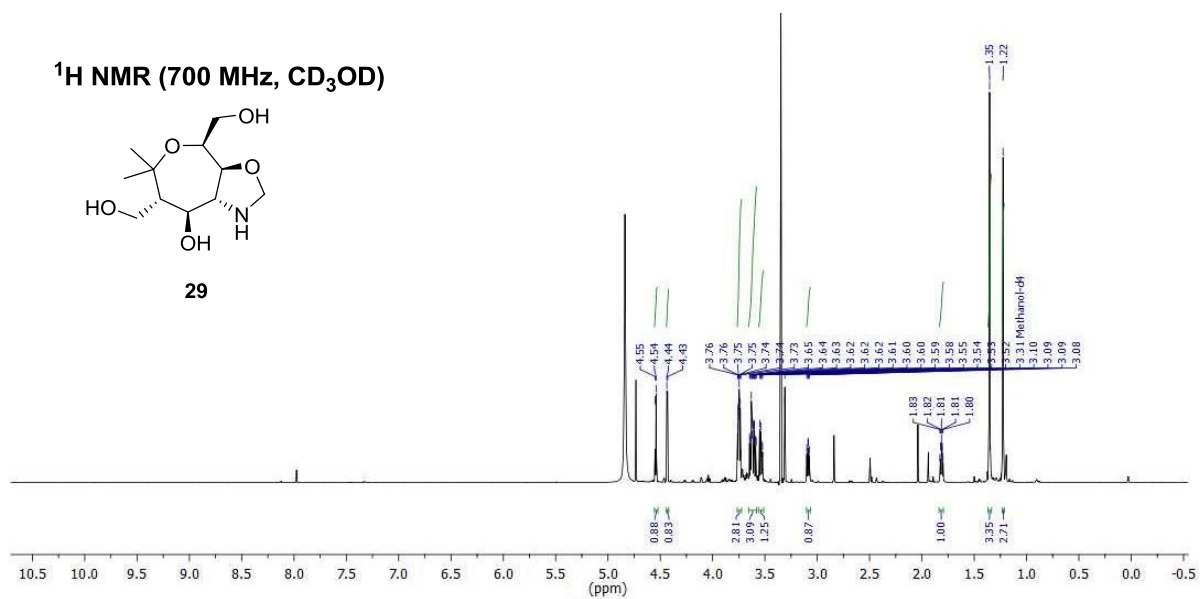

**<sup>13</sup>C NMR (175 MHz, CD<sub>3</sub>OD)**

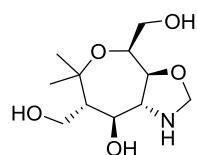

**29**

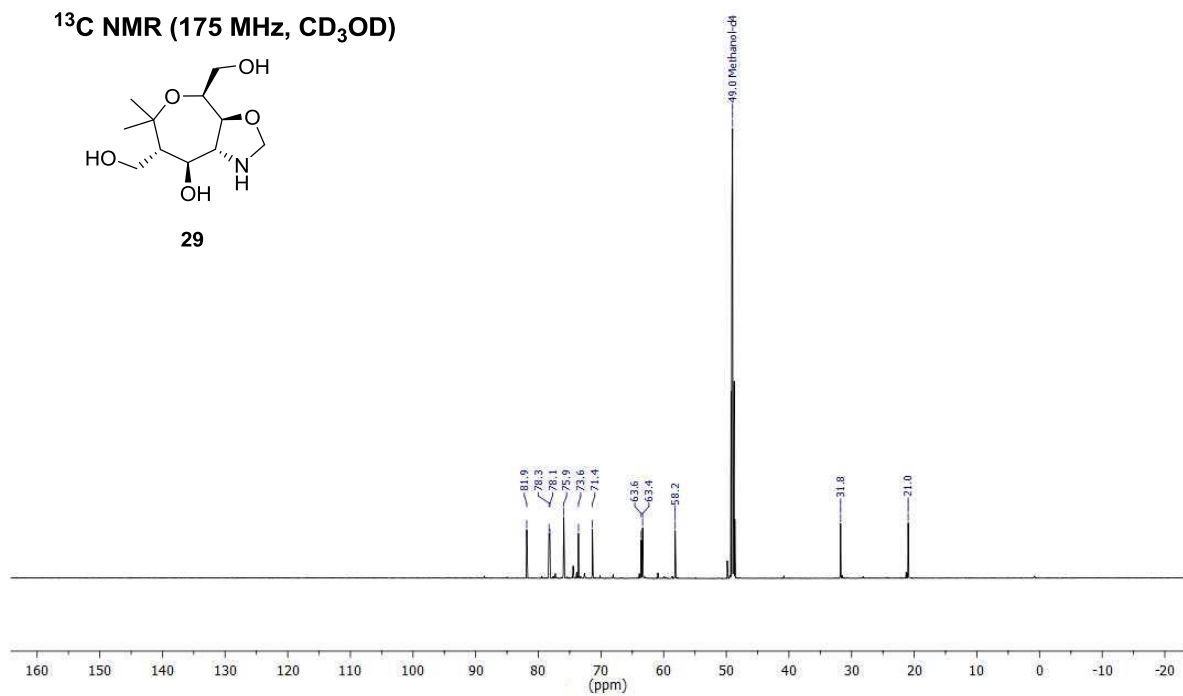

**<sup>1</sup>H NMR (700 MHz, CD<sub>3</sub>OD)**

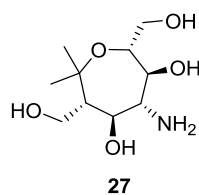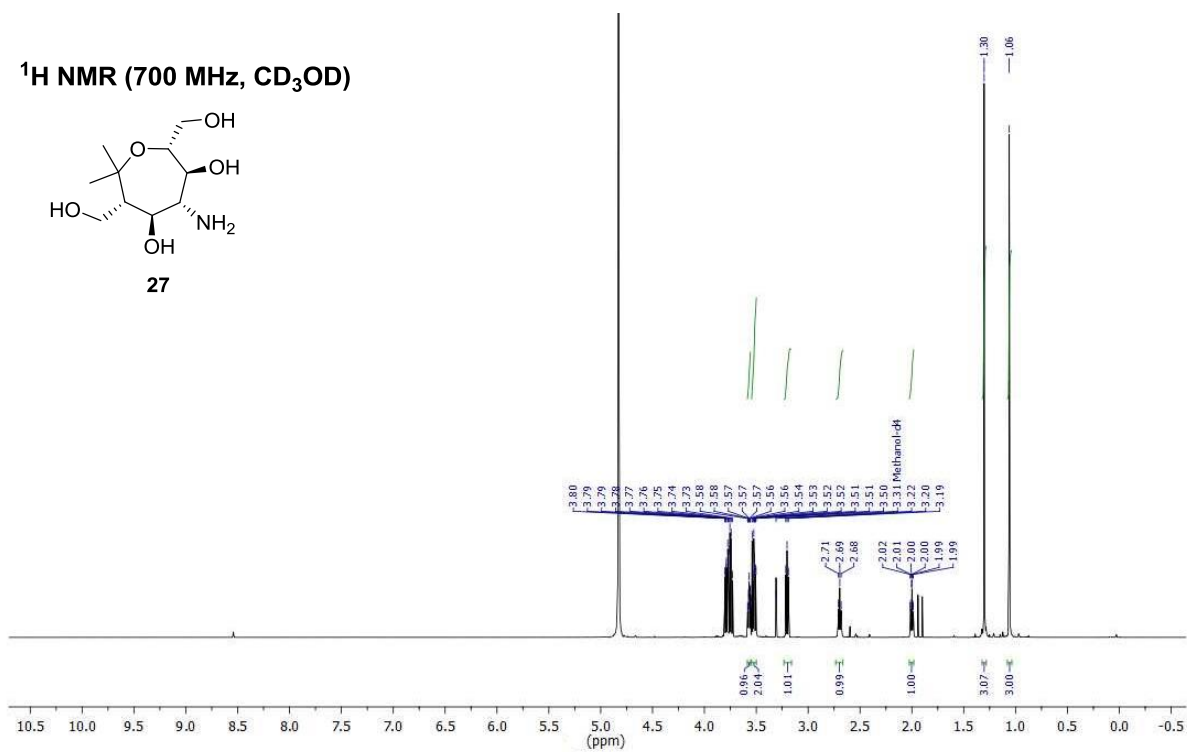

**<sup>13</sup>C NMR (175 MHz, CD<sub>3</sub>OD)**

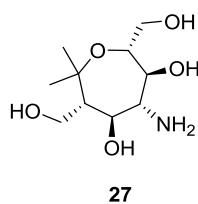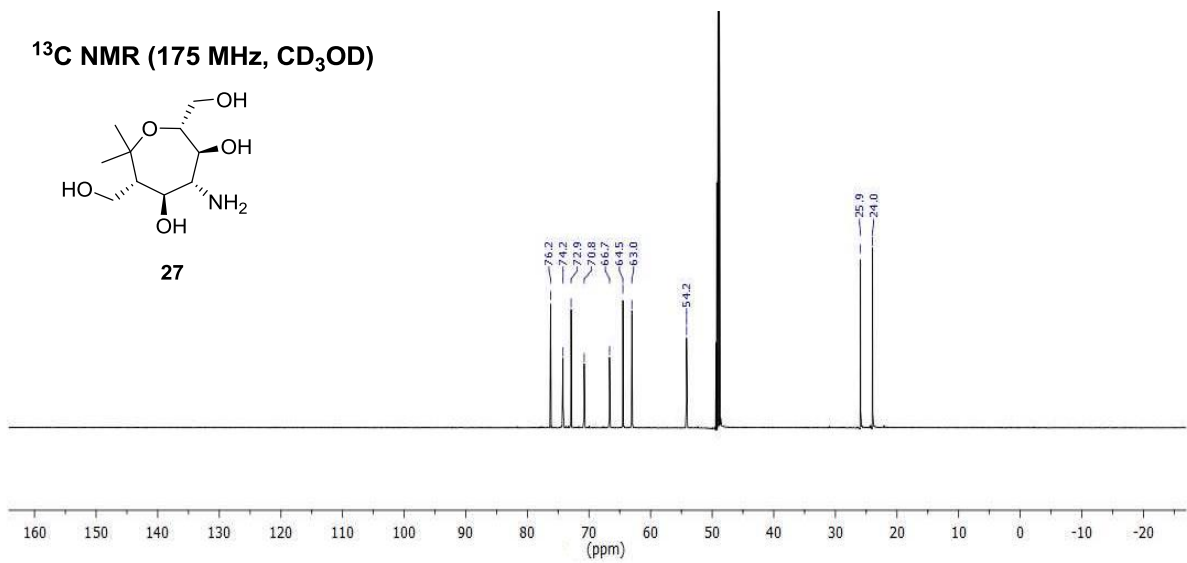



**<sup>1</sup>H NMR (500 MHz, CD<sub>3</sub>OD)**

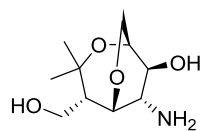

28

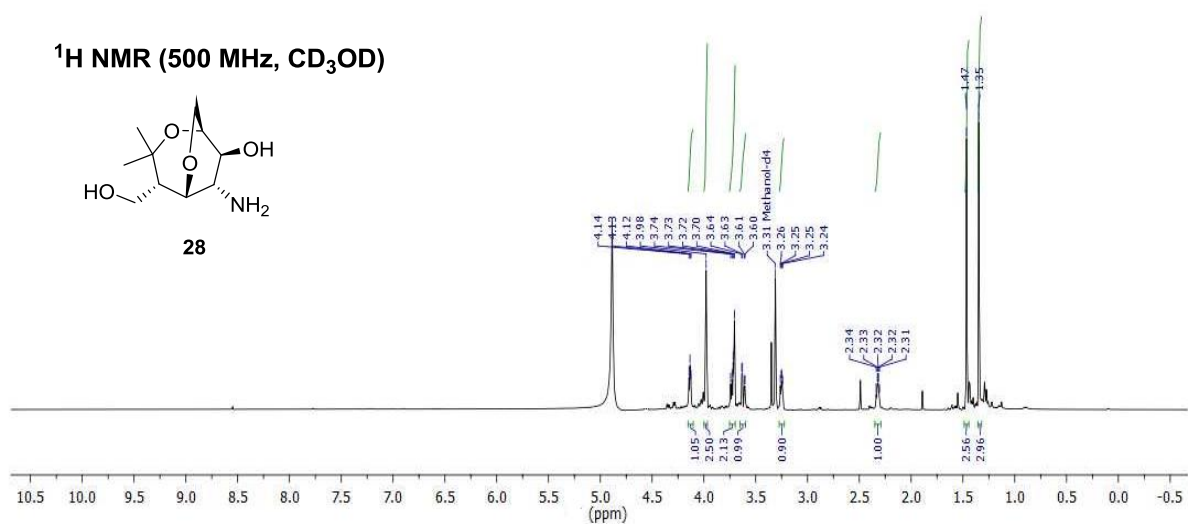

**<sup>13</sup>C NMR (125 MHz, CD<sub>3</sub>OD)**

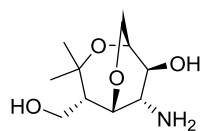

28

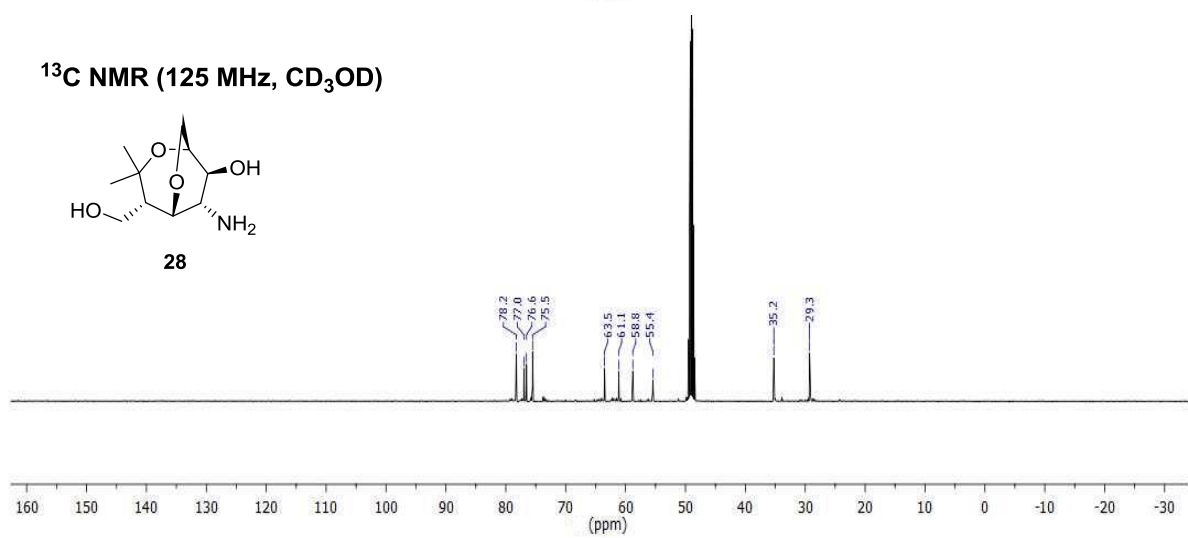

**<sup>1</sup>H NMR (500 MHz, py-d<sub>5</sub>)**

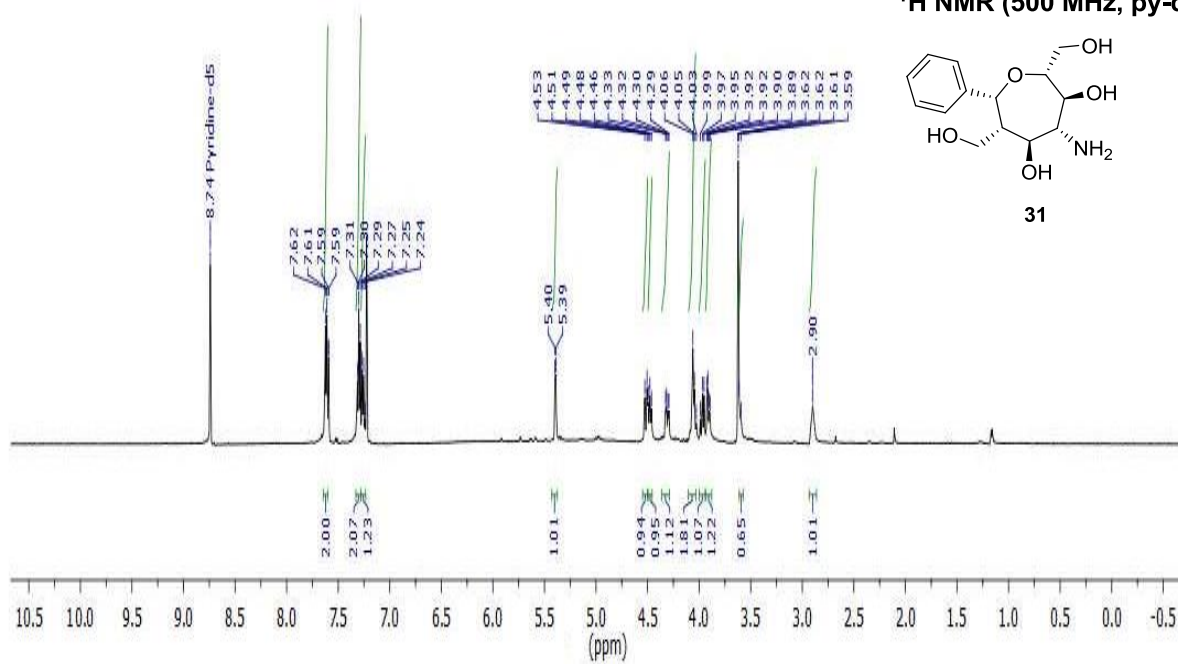

**<sup>13</sup>C NMR (125 MHz, py-d<sub>5</sub>)**

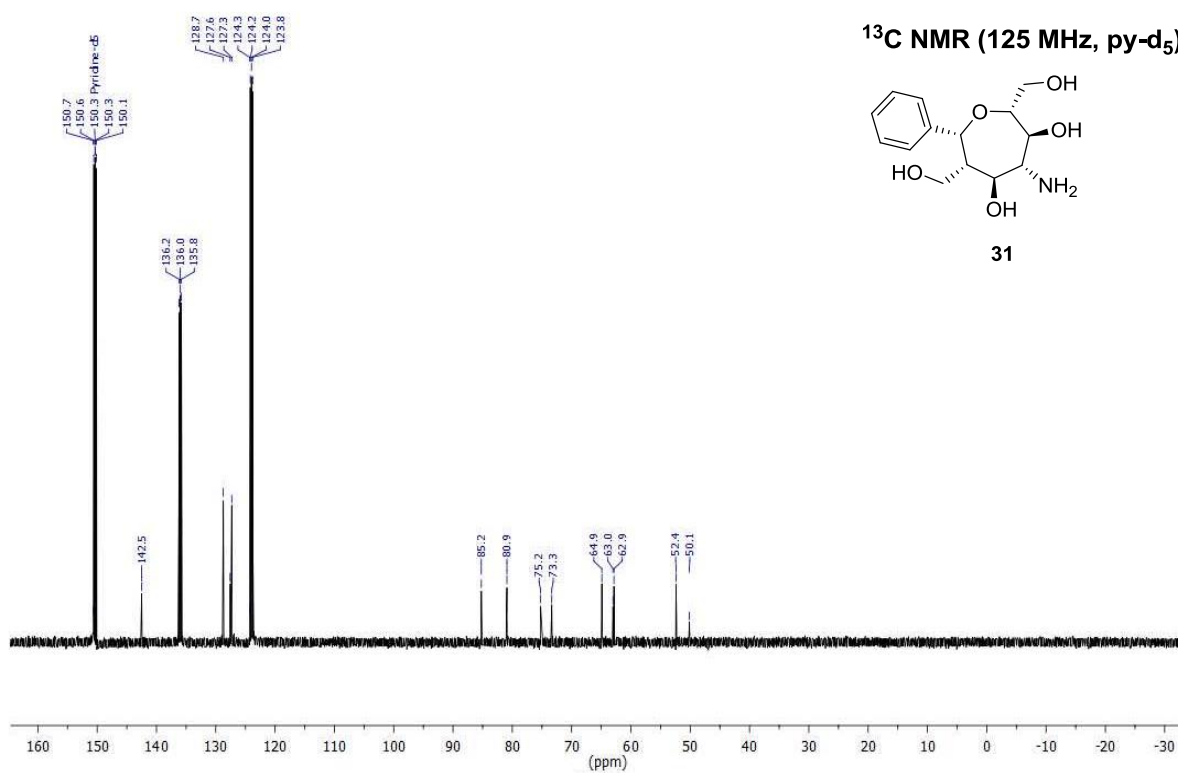

**<sup>1</sup>H NMR (700 MHz, CD<sub>3</sub>OD)**

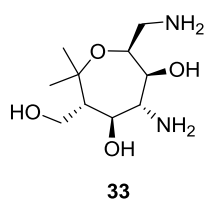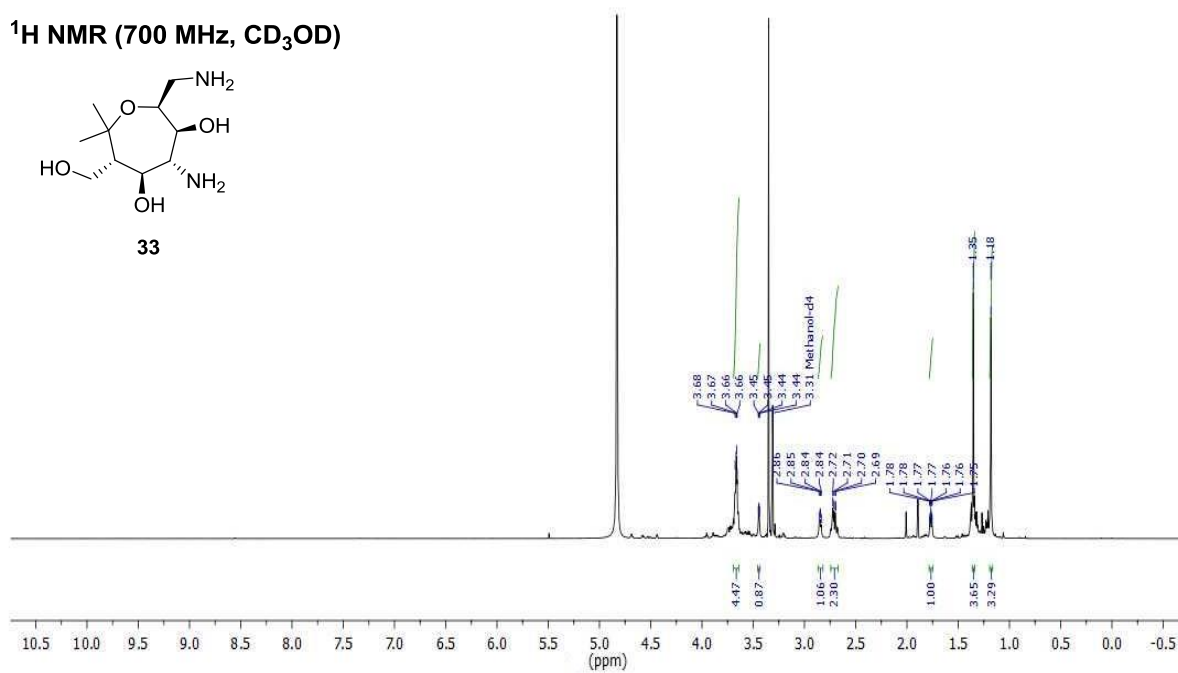

**<sup>13</sup>C NMR (175 MHz, CD<sub>3</sub>OD)**

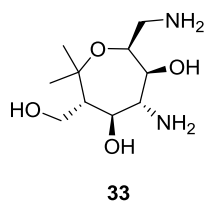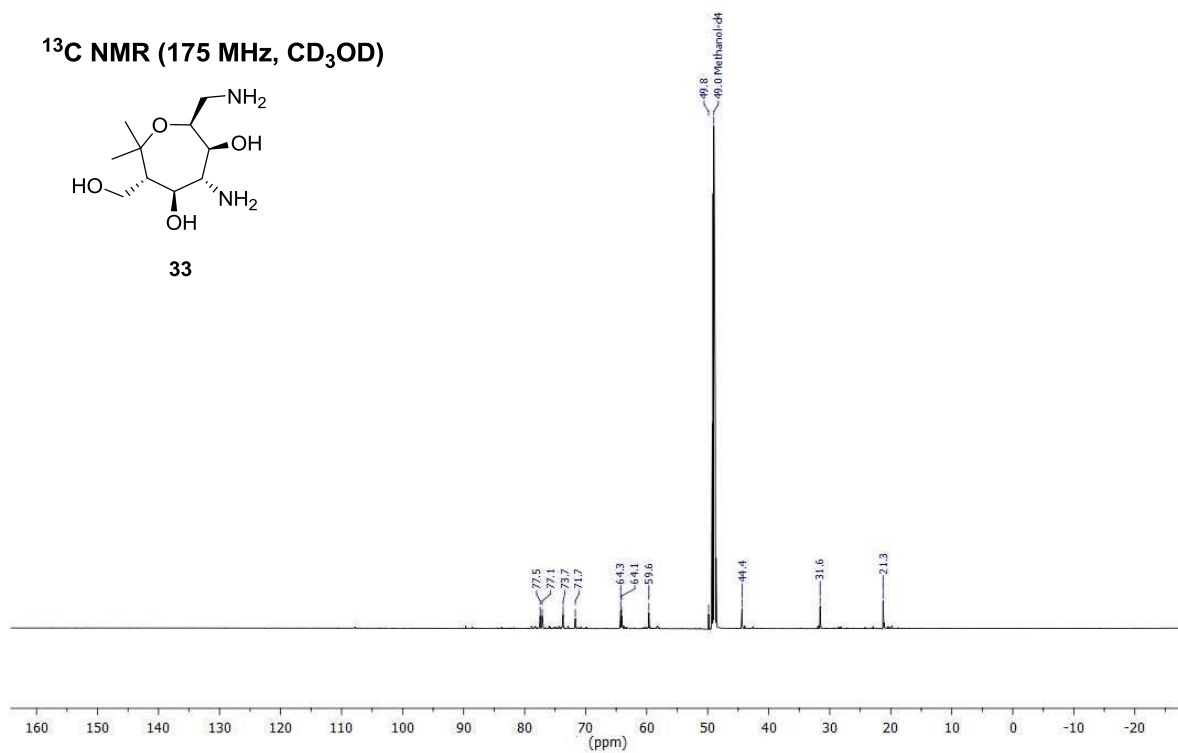

**<sup>1</sup>H NMR (500 MHz, CDCl<sub>3</sub>)**

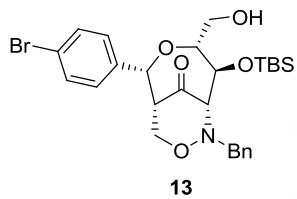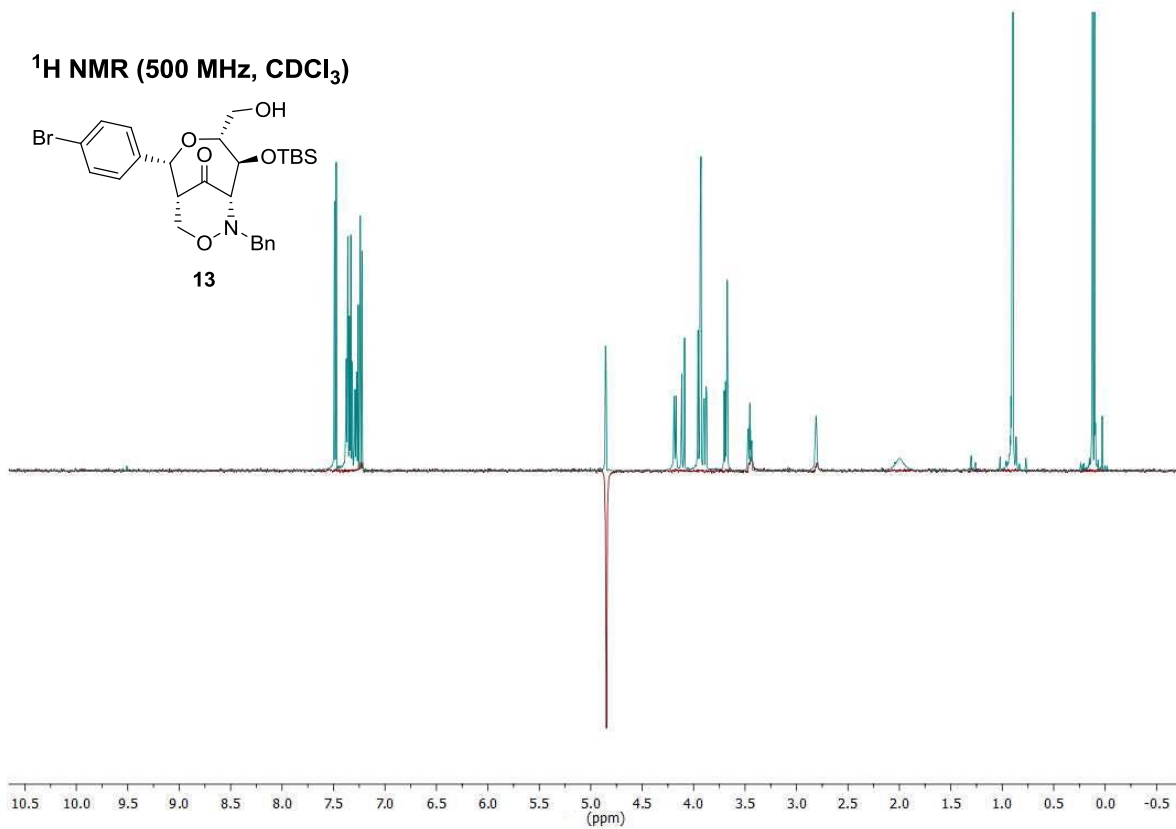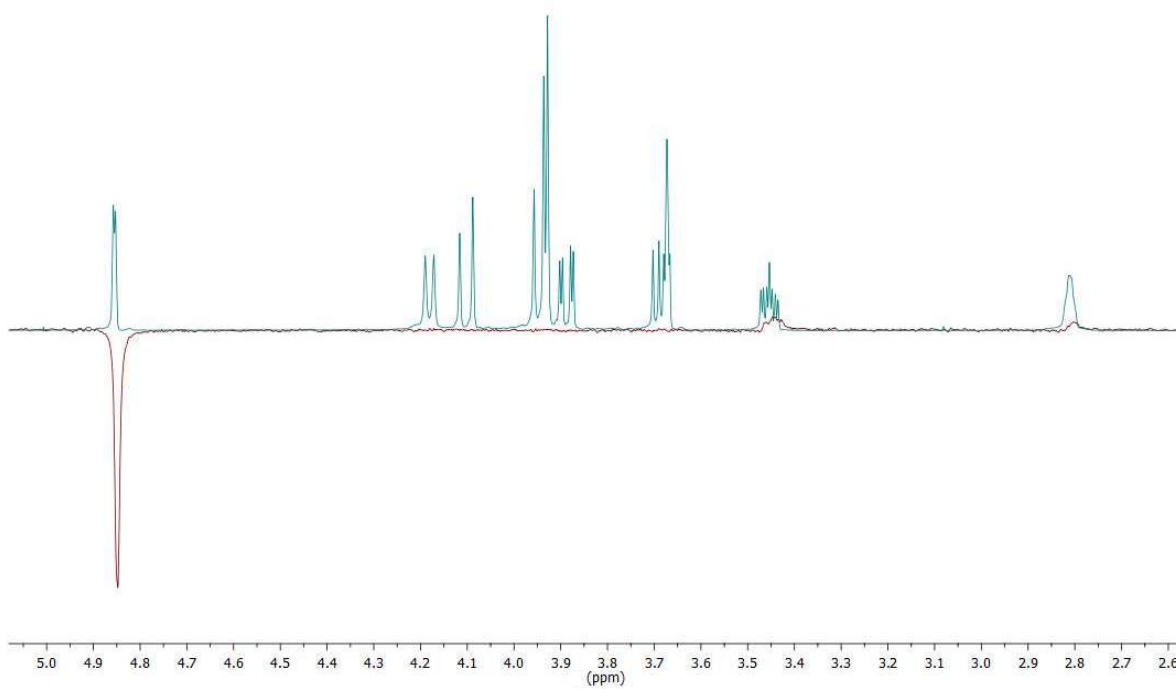

**<sup>1</sup>H NMR (500 MHz, CDCl<sub>3</sub>)**

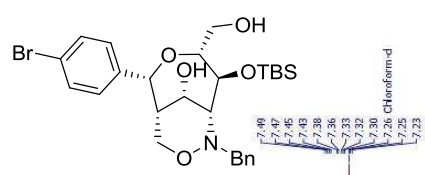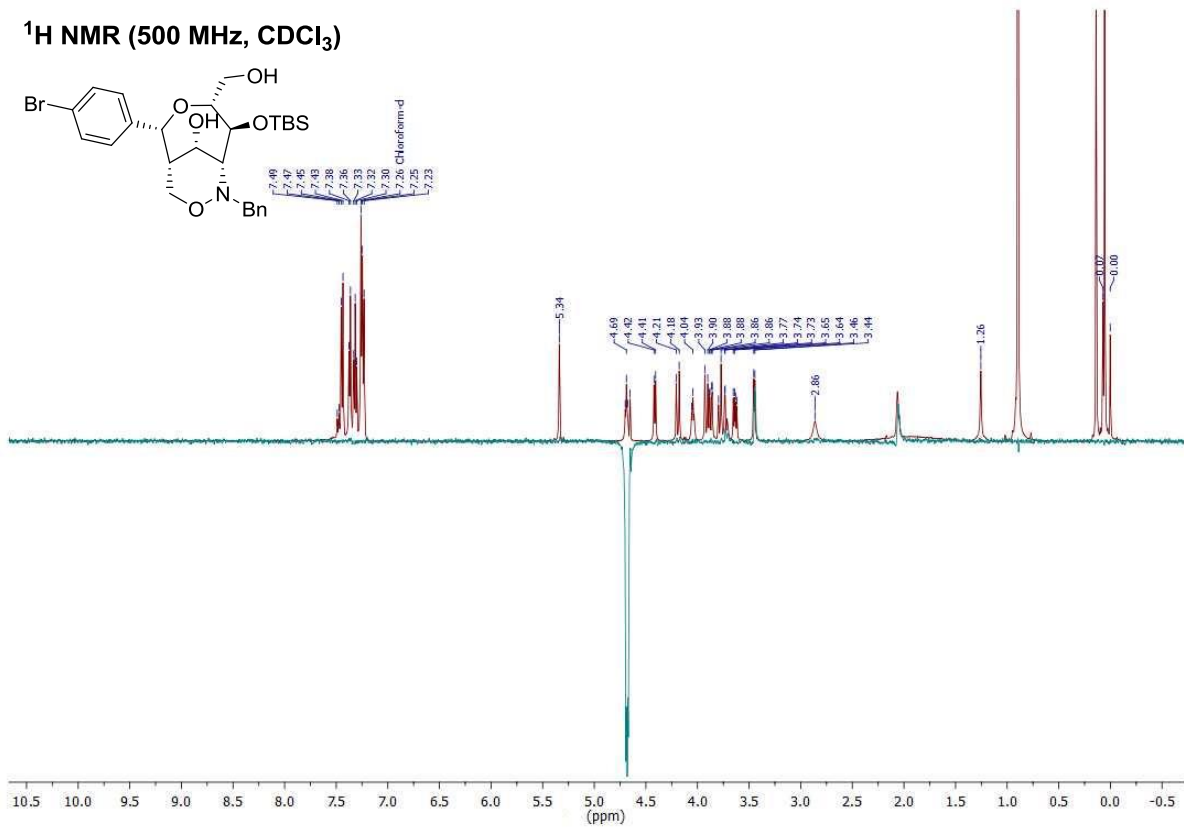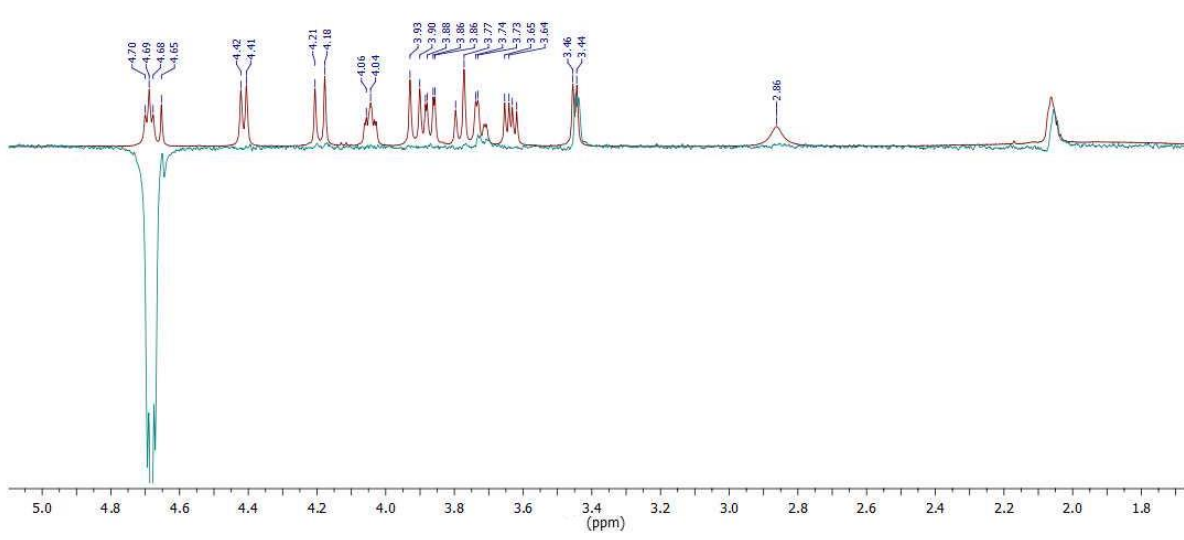

Supplement: Beilstein_J_Org_Chem-10-213-s002.pdf [file Beilstein_J_Org_Chem-10-213-s002.pdf]
